# Supplementary material
Source: MDPI journal article supplement (https://www.mdpi.com/2076-3417/12/19/9627)
Supplement: s1 [file s1]

## Supplementary Materials

**Table S1.** MIGD results (Mean and Standard Deviation) for FDA and dMOP functions.

| DMOPs          | $(\tau_t, n_t)$ | Reference: [16]               |                               |                               |                               |                               |                               | CSA                             | DB-CSA (without<br>Dynamic Process)    | DB-CSA-II (with<br>Dynamic Process)  |
|----------------|-----------------|-------------------------------|-------------------------------|-------------------------------|-------------------------------|-------------------------------|-------------------------------|---------------------------------|----------------------------------------|--------------------------------------|
|                |                 | MMTL-MOEA/D                   | KF-MOEA/D                     | PPS-MOEA/D                    | SVR-MOEA/D                    | Tr-MOEA/D                     | RI-MOEA/D                     |                                 |                                        |                                      |
| <b>FDA1</b>    | (5, 10)         | 0.1214 <sub>(1.07E-1)</sub> - | 0.4670 <sub>(3.38E-1)</sub> - | 0.2485 <sub>(1.40E-1)</sub> - | 0.3745 <sub>(3.12E-1)</sub> - | 0.3381 <sub>(2.14E-1)</sub> - | 0.3166 <sub>(3.58E-1)</sub> - | 2.76e-05 <sub>(2.8e-06)</sub> - | <b>1.39e-07</b> <sub>(2.8e-08)</sub> + | 6.37e-07 <sub>(2.2e-07)</sub>        |
|                | (10, 10)        | 0.1199 <sub>(7.93E-2)</sub> - | 0.2659 <sub>(1.23E-1)</sub> - | 0.2141 <sub>(1.22E-1)</sub> - | 0.2332 <sub>(1.66E-1)</sub> - | 0.3592 <sub>(3.41E-1)</sub> - | 0.2733 <sub>(1.83E-1)</sub> - | 2.56e-05 <sub>(3.7e-06)</sub> - | <b>1.46e-07</b> <sub>(2.3e-08)</sub> + | 6.35e-07 <sub>(2.0e-07)</sub>        |
|                | (20, 10)        | 0.0658 <sub>(3.64E-2)</sub> - | 0.1635 <sub>(9.12E-2)</sub> - | 0.1018 <sub>(1.25E-1)</sub> - | 0.2168 <sub>(2.03E-1)</sub> - | 0.1778 <sub>(2.47E-1)</sub> - | 0.1959 <sub>(2.36E-1)</sub> - | 2.09e-05 <sub>(2.6e-06)</sub> - | <b>8.07e-08</b> <sub>(8.5e-09)</sub> + | 3.39e-07 <sub>(9.8e-08)</sub>        |
| <b>FDA2</b>    | (5, 10)         | 0.0740 <sub>(3.53E-2)</sub> - | 0.1695 <sub>(6.51E-2)</sub> - | 0.1023 <sub>(1.09E-1)</sub> - | 0.2062 <sub>(1.66E-1)</sub> - | 0.1241 <sub>(4.72E-2)</sub> - | 0.2127 <sub>(1.49E-1)</sub> - | 3.79e-05 <sub>(2.1e-06)</sub> - | 4.73e-06 <sub>(8.0e-07)</sub> -        | <b>3.33e-06</b> <sub>(8.8e-07)</sub> |
|                | (10, 10)        | 0.0842 <sub>(3.34E-2)</sub> - | 0.1906 <sub>(7.00E-2)</sub> - | 0.1200 <sub>(2.00E-1)</sub> - | 0.1965 <sub>(1.31E-1)</sub> - | 0.1243 <sub>(4.27E-2)</sub> - | 0.2528 <sub>(1.34E-1)</sub> - | 3.92e-05 <sub>(1.8e-06)</sub> - | 5.08e-06 <sub>(9.8e-07)</sub> -        | <b>4.19e-06</b> <sub>(1.0e-06)</sub> |
|                | (20, 10)        | 0.0662 <sub>(3.63E-2)</sub> - | 0.1335 <sub>(4.02E-2)</sub> - | 0.0719 <sub>(9.86E-2)</sub> - | 0.1810 <sub>(1.88E-1)</sub> - | 0.0785 <sub>(3.37E-2)</sub> - | 0.1678 <sub>(1.44E-1)</sub> - | 2.97e-05 <sub>(1.5e-06)</sub> - | 3.56e-06 <sub>(4.6e-07)</sub> -        | <b>3.06e-06</b> <sub>(8.5e-07)</sub> |
| <b>FDA3</b>    | (5, 10)         | 0.1428 <sub>(1.11E-1)</sub> - | 0.2685 <sub>(2.66E-1)</sub> - | 0.3142 <sub>(2.14E-1)</sub> - | 0.2250 <sub>(1.81E-1)</sub> - | 0.2925 <sub>(2.44E-1)</sub> - | 0.3493 <sub>(4.27E-1)</sub> - | 2.73e-03 <sub>(2.1e-04)</sub> - | 3.96e-04 <sub>(2.8e-05)</sub> -        | <b>2.63e-04</b> <sub>(7.3e-05)</sub> |
|                | (10, 10)        | 0.0914 <sub>(9.77E-2)</sub> - | 0.1429 <sub>(7.49E-2)</sub> - | 0.2072 <sub>(1.38E-1)</sub> - | 0.1994 <sub>(1.93E-1)</sub> - | 0.252 <sub>(2.75E-1)</sub> -  | 0.2530 <sub>(3.05E-1)</sub> - | 3.61e-03 <sub>(3.6e-04)</sub> - | 6.75e-04 <sub>(8.0e-05)</sub> -        | <b>4.69e-04</b> <sub>(1.6e-04)</sub> |
|                | (20, 10)        | 0.0749 <sub>(5.08E-2)</sub> - | 0.1349 <sub>(1.02E-1)</sub> - | 0.2286 <sub>(1.76E-1)</sub> - | 0.1409 <sub>(1.94E-1)</sub> - | 0.1442 <sub>(8.24E-2)</sub> - | 0.1361 <sub>(7.58E-2)</sub> - | 2.61e-03 <sub>(2.3e-04)</sub> - | 4.15e-04 <sub>(4.3e-05)</sub> -        | <b>2.30e-04</b> <sub>(8.6e-05)</sub> |
| <b>FDA4</b>    | (5, 10)         | 0.1523 <sub>(9.67E-2)</sub> - | 0.1578 <sub>(7.21E-2)</sub> - | 0.2114 <sub>(1.48E-1)</sub> - | 0.1866 <sub>(7.83E-2)</sub> - | 0.2335 <sub>(1.21E-1)</sub> - | 0.1702 <sub>(4.11E-2)</sub> - | 1.43e-05 <sub>(1.1e-06)</sub> - | <b>6.94e-07</b> <sub>(8.2e-08)</sub> + | 1.60e-06 <sub>(2.1e-07)</sub>        |
|                | (10, 10)        | 0.1594 <sub>(5.77E-2)</sub> - | 0.1311 <sub>(4.03E-2)</sub> - | 0.1848 <sub>(1.75E-1)</sub> - | 0.1709 <sub>(5.15E-2)</sub> - | 0.2180 <sub>(1.05E-1)</sub> - | 0.1787 <sub>(8.33E-2)</sub> - | 1.43e-05 <sub>(1.8e-06)</sub> - | <b>8.14e-07</b> <sub>(1.6e-07)</sub> + | 1.43e-06 <sub>(1.7e-07)</sub>        |
|                | (20, 10)        | 0.1336 <sub>(3.89E-2)</sub> - | 0.125 <sub>(4.06E-2)</sub> -  | 0.1765 <sub>(2.02E-1)</sub> - | 0.1234 <sub>(2.36E-2)</sub> - | 0.1998 <sub>(9.90E-2)</sub> - | 0.1253 <sub>(2.66E-2)</sub> - | 1.18e-05 <sub>(1.2e-06)</sub> - | <b>5.95e-07</b> <sub>(8.0e-08)</sub> + | 9.48e-07 <sub>(1.2e-07)</sub>        |
| <b>FDA5</b>    | (5, 10)         | 0.2081 <sub>(6.47E-2)</sub> - | 0.2683 <sub>(8.65E-2)</sub> - | 0.2036 <sub>(7.28E-2)</sub> - | 0.2120 <sub>(1.05E-1)</sub> - | 0.1737 <sub>(4.19E-2)</sub> - | 0.2184 <sub>(1.01E-1)</sub> - | 7.37e-05 <sub>(3.6e-06)</sub> - | 4.51e-05 <sub>(1.4e-06)</sub> -        | <b>3.78e-06</b> <sub>(4.7e-07)</sub> |
|                | (10, 10)        | 0.1892 <sub>(5.19E-2)</sub> - | 0.2369 <sub>(7.79E-2)</sub> - | 0.2305 <sub>(1.04E-1)</sub> - | 0.1862 <sub>(9.43E-2)</sub> - | 0.1752 <sub>(4.89E-2)</sub> - | 0.2140 <sub>(1.01E-1)</sub> - | 7.52e-05 <sub>(5.5e-06)</sub> - | 4.72e-05 <sub>(1.8e-06)</sub> -        | <b>3.90e-06</b> <sub>(6.9e-07)</sub> |
|                | (20, 10)        | 0.1642 <sub>(6.06E-2)</sub> - | 0.1818 <sub>(5.76E-2)</sub> - | 0.1895 <sub>(8.11E-2)</sub> - | 0.1729 <sub>(9.00E-2)</sub> - | 0.1879 <sub>(4.56E-2)</sub> - | 0.1968 <sub>(7.64E-2)</sub> - | 5.67e-05 <sub>(3.1e-06)</sub> - | 3.50e-05 <sub>(1.3e-06)</sub> -        | <b>2.20e-06</b> <sub>(3.2e-07)</sub> |
| <b>dMOP1</b>   | (5, 10)         | 0.0589 <sub>(3.82E-2)</sub> - | 0.1857 <sub>(9.13E-2)</sub> - | 0.1269 <sub>(2.37E-1)</sub> - | 0.2237 <sub>(8.15E-2)</sub> - | 0.2345 <sub>(6.53E-2)</sub> - | 0.2421 <sub>(1.33E-1)</sub> - | 2.07e-04 <sub>(3.8e-05)</sub> - | 1.10e-05 <sub>(5.4e-09)</sub> -        | <b>7.28e-07</b> <sub>(1.3e-07)</sub> |
|                | (10, 10)        | 0.0543 <sub>(5.52E-2)</sub> - | 0.1565 <sub>(7.39E-2)</sub> - | 0.0965 <sub>(2.18E-1)</sub> - | 0.3266 <sub>(1.99E-1)</sub> - | 0.2507 <sub>(8.15E-2)</sub> - | 0.2734 <sub>(1.46E-1)</sub> - | 1.90e-04 <sub>(4.0e-05)</sub> - | 1.09e-05 <sub>(6.5e-09)</sub> -        | <b>5.95e-07</b> <sub>(9.0e-08)</sub> |
|                | (20, 10)        | 0.0252 <sub>(9.00E-3)</sub> - | 0.1145 <sub>(5.03E-2)</sub> - | 0.0690 <sub>(1.95E-1)</sub> - | 0.1938 <sub>(1.25E-1)</sub> - | 0.1204 <sub>(9.13E-2)</sub> - | 0.1606 <sub>(1.63E-1)</sub> - | 1.26e-04 <sub>(2.6e-05)</sub> - | 8.27e-06 <sub>(6.1e-09)</sub> -        | <b>3.66e-07</b> <sub>(6.0e-08)</sub> |
| <b>dMOP2</b>   | (5, 10)         | 0.0494 <sub>(1.59E-2)</sub> - | 0.2258 <sub>(1.31E-1)</sub> - | 0.1265 <sub>(1.34E-1)</sub> - | 0.1302 <sub>(8.99E-2)</sub> - | 0.1311 <sub>(6.02E-2)</sub> - | 0.1505 <sub>(1.58E-1)</sub> - | 1.87e-04 <sub>(4.4e-05)</sub> - | 3.35e-06 <sub>(5.2e-08)</sub> -        | <b>1.99e-06</b> <sub>(7.5e-07)</sub> |
|                | (10, 10)        | 0.0717 <sub>(4.20E-2)</sub> - | 0.1646 <sub>(8.01E-2)</sub> - | 0.1102 <sub>(1.00E-1)</sub> - | 0.1142 <sub>(8.98E-2)</sub> - | 0.1157 <sub>(6.03E-2)</sub> - | 0.1586 <sub>(1.33E-1)</sub> - | 1.78e-04 <sub>(4.8e-05)</sub> - | 3.14e-06 <sub>(3.3e-08)</sub> -        | <b>2.38e-06</b> <sub>(8.0e-07)</sub> |
|                | (20, 10)        | 0.0261 <sub>(8.53E-3)</sub> - | 0.120 <sub>(8.70E-2)</sub> -  | 0.0771 <sub>(1.12E-1)</sub> - | 0.0541 <sub>(4.82E-2)</sub> - | 0.0795 <sub>(4.89E-2)</sub> - | 0.0609 <sub>(4.64E-2)</sub> - | 1.28e-04 <sub>(3.0e-05)</sub> - | 2.62e-06 <sub>(2.0e-08)</sub> -        | <b>9.89e-07</b> <sub>(2.7e-07)</sub> |
| <b>dMOP3</b>   | (5, 10)         | 0.0593 <sub>(3.10E-2)</sub> - | 0.1132 <sub>(8.72E-2)</sub> - | 0.1136 <sub>(8.84E-2)</sub> - | 0.0987 <sub>(7.16E-2)</sub> - | 0.1203 <sub>(4.29E-2)</sub> - | 0.0729 <sub>(3.87E-2)</sub> - | 7.68e-03 <sub>(3.1e-04)</sub> - | 8.42e-03 <sub>(3.3e-04)</sub> -        | <b>2.55e-03</b> <sub>(5.8e-04)</sub> |
|                | (10, 10)        | 0.0683 <sub>(4.26E-2)</sub> - | 0.1431 <sub>(5.58E-2)</sub> - | 0.0736 <sub>(6.38E-2)</sub> - | 0.0897 <sub>(4.56E-2)</sub> - | 0.1057 <sub>(5.18E-2)</sub> - | 0.0850 <sub>(5.68E-2)</sub> - | 2.39e-03 <sub>(4.9e-06)</sub> - | 2.38e-03 <sub>(6.7e-09)</sub> -        | <b>7.66e-05</b> <sub>(1.5e-05)</sub> |
|                | (20, 10)        | 0.0260 <sub>(5.56E-3)</sub> - | 0.0730 <sub>(4.91E-2)</sub> - | 0.0563 <sub>(6.87E-2)</sub> - | 0.0510 <sub>(3.52E-2)</sub> - | 0.0575 <sub>(3.22E-2)</sub> - | 0.0401 <sub>(2.57E-2)</sub> - | 2.61e-02 <sub>(5.9e-04)</sub> - | 2.78e-02 <sub>(3.3e-04)</sub> -        | <b>5.84e-04</b> <sub>(3.1e-04)</sub> |
| +/-/ $\approx$ |                 |                               | <b>0/24/0</b>                 | <b>0/24/0</b>                 | <b>0/24/0</b>                 | <b>0/24/0</b>                 | <b>0/24/0</b>                 | <b>0/24/0</b>                   | <b>6/18/0</b>                          |                                      |

The symbols “+”, “ $\approx$ ” and “-” denote that the performance of the compared algorithm is statistically better than, equivalent to, and worse than **DB-CSA with dynamic process**.

**Table S2.** IGD results (Mean and Standard Deviation) for FDA and dMOP functions.

| DMOPs        |                 | Reference: [12]                |                               |                               |                               |                               | CSA                             | DB-CSA (without<br>Dynamic Process)    | DB-CSA-II (with<br>Dynamic Process)  |
|--------------|-----------------|--------------------------------|-------------------------------|-------------------------------|-------------------------------|-------------------------------|---------------------------------|----------------------------------------|--------------------------------------|
|              | $(\tau_t, n_t)$ | DNSGA-II                       | dCOEA                         | PPS                           | MOEA/D                        | SGEA                          |                                 |                                        |                                      |
| <b>FDA1</b>  | (5, 10)         | 6.40E-1 <sub>(9.8E-2)</sub> -  | 6.36E-2 <sub>(1.1E-2)</sub> - | 2.08E-1 <sub>(8.4E-2)</sub> - | 3.56E-1 <sub>(4.9E-2)</sub> - | 3.41E-2 <sub>(8.0E-3)</sub> - | 2.48e-02 <sub>(2.5e-03)</sub> - | <b>1.25e-04</b> <sub>(2.5e-05)</sub> + | 5.73e-04 <sub>(2.0e-04)</sub>        |
|              | (10, 10)        | 5.82E-2 <sub>(3.8E-3)</sub> -  | 4.13E-2 <sub>(6.5E-3)</sub> - | 4.27E-2 <sub>(1.9E-2)</sub> - | 1.21E-1 <sub>(1.1E-2)</sub> - | 1.48E-2 <sub>(2.0E-3)</sub> - | 2.30e-02 <sub>(3.4e-03)</sub> - | <b>1.31e-04</b> <sub>(2.1e-05)</sub> + | 5.71e-04 <sub>(1.8e-04)</sub>        |
|              | (20, 10)        | 4.14E-2 <sub>(4.2E-3)</sub> -  | 2.39E-2 <sub>(2.2E-3)</sub> - | 1.62E-2 <sub>(7.9E-3)</sub> - | 4.04E-2 <sub>(2.2E-3)</sub> - | 7.55E-3 <sub>(1.4E-3)</sub> - | 1.88e-02 <sub>(2.3e-03)</sub> - | <b>7.26e-05</b> <sub>(7.6e-06)</sub> + | 3.05e-04 <sub>(8.9e-05)</sub>        |
| <b>FDA2</b>  | (5, 10)         | 2.85E-2 <sub>(2.4E-3)</sub> -  | 7.28E-2 <sub>(3.8E-2)</sub> - | 8.13E-2 <sub>(3.0E-2)</sub> - | 8.40E-2 <sub>(1.3E-2)</sub> - | 1.50E-2 <sub>(1.6E-3)</sub> - | 3.41e-02 <sub>(1.9e-03)</sub> - | 4.25e-03 <sub>(7.2e-04)</sub> -        | <b>2.99e-03</b> <sub>(7.9e-04)</sub> |
|              | (10, 10)        | 1.68E-3 <sub>(9.0E-4)</sub> -  | 4.73E-2 <sub>(3.3E-2)</sub> - | 6.35E-2 <sub>(1.0E-2)</sub> - | 3.38E-2 <sub>(8.8E-3)</sub> - | 9.11E-3 <sub>(6.3E-4)</sub> - | 3.53e-02 <sub>(1.6e-03)</sub> - | 4.57e-03 <sub>(8.8e-04)</sub> -        | <b>3.77e-03</b> <sub>(9.1e-04)</sub> |
|              | (20, 10)        | 6.51E-3 <sub>(5.3E-4)</sub> -  | 3.24E-2 <sub>(4.6E-2)</sub> - | 6.27E-2 <sub>(9.1E-3)</sub> - | 1.64E-2 <sub>(4.9E-3)</sub> - | 6.32E-3 <sub>(4.1E-4)</sub> - | 2.68e-02 <sub>(1.4e-03)</sub> - | 3.20e-03 <sub>(4.2e-04)</sub> -        | <b>2.75e-03</b> <sub>(7.6e-04)</sub> |
| <b>FDA3</b>  | (5, 10)         | 2.63E-1 <sub>(6.0E-2)</sub> -  | 2.63E-1 <sub>(3.5E-2)</sub> - | 4.43E-1 <sub>(1.1E-1)</sub> - | 2.47E-1 <sub>(2.3E-2)</sub> - | 6.25E-2 <sub>(3.8E-2)</sub> - | 2.45e+00 <sub>(1.9e-01)</sub> - | 3.56e-01 <sub>(2.5e-02)</sub> -        | <b>2.36e-01</b> <sub>(6.6e-02)</sub> |
|              | (10, 10)        | 1.08E-1 <sub>(3.3E-2)</sub> -  | 1.95E-1 <sub>(3.2E-2)</sub> - | 2.19E-1 <sub>(1.8E-2)</sub> - | 1.30E-1 <sub>(2.5E-2)</sub> - | 4.03E-2 <sub>(2.9E-2)</sub> - | 3.25e+00 <sub>(3.2e-01)</sub> - | 6.07e-01 <sub>(7.2e-02)</sub> -        | <b>4.22e-01</b> <sub>(1.5e-01)</sub> |
|              | (20, 10)        | 9.03E-2 <sub>(2.8E-3)</sub> -  | 1.26E-1 <sub>(3.1E-2)</sub> - | 1.92E-1 <sub>(2.4E-2)</sub> - | 5.45E-2 <sub>(8.3E-3)</sub> - | 3.52E-2 <sub>(2.9E-2)</sub> - | 2.35e+00 <sub>(2.1e-01)</sub> - | 3.74e-01 <sub>(3.9e-02)</sub> -        | <b>2.07e-01</b> <sub>(7.7e-02)</sub> |
| <b>FDA4</b>  | (5, 10)         | 1.49E+0 <sub>(1.2E-1)</sub> -  | 1.62E-1 <sub>(6.1E-3)</sub> - | 3.07E-1 <sub>(1.9E-2)</sub> - | 1.36E+0 <sub>(1.6E-1)</sub> - | 4.60E-1 <sub>(6.6E-2)</sub> - | 1.29e-02 <sub>(9.9e-04)</sub> - | <b>6.25e-04</b> <sub>(7.3e-05)</sub> + | 1.44e-03 <sub>(1.9e-04)</sub>        |
|              | (10, 10)        | 7.63E-1 <sub>(4.4E-2)</sub> -  | 1.24E-1 <sub>(4.5E-3)</sub> - | 2.11E-1 <sub>(2.0E-2)</sub> - | 5.77E-1 <sub>(5.4E-2)</sub> - | 1.83E-1 <sub>(6.6E-3)</sub> - | 1.29e-02 <sub>(1.6e-03)</sub> - | <b>7.33e-04</b> <sub>(1.4e-04)</sub> + | 1.29e-03 <sub>(1.5e-04)</sub>        |
|              | (20, 10)        | 2.62E-1 <sub>(1.6E-2)</sub> -  | 1.03E-1 <sub>(1.7E-3)</sub> - | 1.79E-1 <sub>(3.0E-3)</sub> - | 2.22E-1 <sub>(1.3E-2)</sub> - | 1.26E-1 <sub>(1.5E-3)</sub> - | 1.06e-02 <sub>(1.1e-03)</sub> - | <b>5.36e-04</b> <sub>(7.2e-05)</sub> + | 8.54e-04 <sub>(1.1e-04)</sub>        |
| <b>FDA5</b>  | (5, 10)         | 1.76E+0 <sub>(1.0E-1)</sub> -  | 4.33E-1 <sub>(4.6E-2)</sub> - | 6.55E-1 <sub>(3.1E-2)</sub> - | 1.57E+0 <sub>(1.3E-1)</sub> - | 5.23E-1 <sub>(3.3E-2)</sub> - | 6.64e-02 <sub>(3.2e-03)</sub> - | 4.06e-02 <sub>(1.2e-03)</sub> -        | <b>3.40e-03</b> <sub>(4.3e-04)</sub> |
|              | (10, 10)        | 1.02E+0 <sub>(5.4E-2)</sub> -  | 3.62E-1 <sub>(4.0E-2)</sub> - | 4.80E-1 <sub>(3.5E-2)</sub> - | 8.19E-1 <sub>(6.0E-2)</sub> - | 3.62E-1 <sub>(8.5E-3)</sub> - | 6.77e-02 <sub>(5.0e-03)</sub> - | 4.25e-02 <sub>(1.6e-03)</sub> -        | <b>3.51e-03</b> <sub>(6.2e-04)</sub> |
|              | (20, 10)        | 4.88E-1 <sub>(1.2E-2)</sub> -  | 3.10E-1 <sub>(2.7E-2)</sub> - | 3.71E-1 <sub>(1.2E-2)</sub> - | 4.07E-1 <sub>(1.4E-2)</sub> - | 3.09E-1 <sub>(2.2E-3)</sub> - | 5.10e-02 <sub>(2.8e-03)</sub> - | 3.15e-02 <sub>(1.2e-03)</sub> -        | <b>1.98e-03</b> <sub>(2.9e-04)</sub> |
| <b>dMOP1</b> | (5, 10)         | 1.31E-1 <sub>(1.1E-2)</sub> -  | 6.95E-2 <sub>(1.4E-2)</sub> - | 4.15E-1 <sub>(7.4E-1)</sub> - | 1.36E-2 <sub>(9.0E-3)</sub> - | 1.12E-2 <sub>(8.1E-3)</sub> - | 1.87e-01 <sub>(3.4e-02)</sub> - | 9.89e-03 <sub>(4.8e-06)</sub> -        | <b>6.55e-04</b> <sub>(1.2e-04)</sub> |
|              | (10, 10)        | 8.83E-3 <sub>(5.0E-3)</sub> -  | 3.93E-2 <sub>(6.2E-3)</sub> - | 5.09E-2 <sub>(9.3E-2)</sub> - | 9.39E-3 <sub>(4.3E-3)</sub> - | 8.24E-3 <sub>(5.3E-3)</sub> - | 1.71e-01 <sub>(3.6e-02)</sub> - | 9.78e-03 <sub>(5.8e-06)</sub> -        | <b>5.35e-04</b> <sub>(8.1e-05)</sub> |
|              | (20, 10)        | 7.39E-3 <sub>(3.2E-3)</sub> -  | 1.88E-2 <sub>(2.3E-3)</sub> - | 4.39E-2 <sub>(8.4E-2)</sub> - | 7.17E-3 <sub>(2.7E-3)</sub> - | 6.54E-3 <sub>(3.0E-3)</sub> - | 1.13e-01 <sub>(2.3e-02)</sub> - | 7.44e-03 <sub>(5.5e-06)</sub> -        | <b>3.30e-04</b> <sub>(5.4e-05)</sub> |
| <b>dMOP2</b> | (5, 10)         | 6.87E-1 <sub>(7.5E-2)</sub> -  | 1.20E-1 <sub>(2.0E-2)</sub> - | 1.56E-1 <sub>(1.8E-2)</sub> - | 4.91E-1 <sub>(4.1E-2)</sub> - | 3.02E-2 <sub>(3.4E-3)</sub> - | 1.69e-01 <sub>(3.9e-02)</sub> - | 3.01e-03 <sub>(4.6e-05)</sub> -        | <b>1.79e-03</b> <sub>(6.7e-04)</sub> |
|              | (10, 10)        | 1.18E-1 <sub>(9.4E-3)</sub> -  | 7.32E-2 <sub>(8.9E-3)</sub> - | 4.28E-1 <sub>(1.7E-2)</sub> - | 1.88E-1 <sub>(1.9E-2)</sub> - | 1.21E-2 <sub>(5.7E-4)</sub> - | 1.61e-01 <sub>(4.3e-02)</sub> - | 2.82e-03 <sub>(3.0e-05)</sub> -        | <b>2.15e-03</b> <sub>(7.2e-04)</sub> |
|              | (20, 10)        | 1.57E-1 <sub>(6.70E-4)</sub> - | 3.46E-2 <sub>(4.3E-3)</sub> - | 2.02E-2 <sub>(2.5E-3)</sub> - | 5.63E-2 <sub>(3.9E-3)</sub> - | 6.32E-3 <sub>(1.8E-4)</sub> - | 1.15e-01 <sub>(2.7e-02)</sub> - | 2.36e-03 <sub>(1.8e-05)</sub> -        | <b>8.91e-04</b> <sub>(2.4e-04)</sub> |
| <b>dMOP3</b> | (5, 10)         | 5.62E-1 <sub>(3.9E-2)</sub> -  | 4.95E-2 <sub>(4.8E-3)</sub> - | 1.76E-1 <sub>(8.0E-2)</sub> - | 3.42E-1 <sub>(1.9E-2)</sub> - | 1.81E-1 <sub>(9.6E-2)</sub> - | 6.91e+00 <sub>(2.8e-01)</sub> - | 7.58e+00 <sub>(3.0e-01)</sub> -        | <b>2.30e+00</b> <sub>(5.2e-01)</sub> |
|              | (10, 10)        | 2.00E-1 <sub>(1.5E-2)</sub> -  | 2.95E-2 <sub>(2.4E-3)</sub> - | 1.13E-1 <sub>(1.2E-2)</sub> - | 1.68E-1 <sub>(1.0E-2)</sub> - | 1.32E-1 <sub>(1.3E-2)</sub> - | 2.15e+00 <sub>(4.4e-03)</sub> - | 2.14e+00 <sub>(6.0e-06)</sub> -        | <b>6.89e-02</b> <sub>(1.3e-02)</sub> |
|              | (20, 10)        | 1.07E-1 <sub>(8.5E-3)</sub> -  | 1.63E-2 <sub>(1.7E-3)</sub> - | 8.99E-2 <sub>(6.7E-3)</sub> - | 6.27E-2 <sub>(4.4E-3)</sub> - | 8.15E-2 <sub>(1.3E-2)</sub> - | 2.35e+01 <sub>(5.3e-01)</sub> - | 2.50e+01 <sub>(2.9e-01)</sub> -        | <b>5.26e-01</b> <sub>(2.8e-01)</sub> |
| <b>+/-/≈</b> |                 | <b>0/24/0</b>                  | <b>0/24/0</b>                 | <b>0/24/0</b>                 | <b>0/24/0</b>                 | <b>0/24/0</b>                 | <b>0/24/0</b>                   | <b>6/18/0</b>                          |                                      |

The symbols “+”, “≈” and “-” denote that the performance of the compared algorithm is statistically better than, equivalent to, and worse than **DB-CSA**.

**Table S3.** HVD results (Mean and Standard Deviation) for FDA and dMOP functions

|                |                 | Reference: [12]                |                                      |                               |                                      |                                      | CSA                             | DB-CSA (without<br>Dynamic Process)    | DB-CSA-II (with<br>Dynamic Process)  |
|----------------|-----------------|--------------------------------|--------------------------------------|-------------------------------|--------------------------------------|--------------------------------------|---------------------------------|----------------------------------------|--------------------------------------|
| Prob.          | $(\tau_t, n_t)$ | DNSGA-II                       | dCOEA                                | PPS                           | MOEA/D                               | SGEA                                 |                                 |                                        |                                      |
| <b>FDA1</b>    | (5, 10)         | 8.70E-1 <sub>(7.5E-2)</sub> -  | 1.25E-1 <sub>(2.4E-2)</sub> -        | 3.87E-1 <sub>(1.0E-1)</sub> - | 7.70E-1 <sub>(9.4E-2)</sub> -        | 8.14E-2 <sub>(2.0E-2)</sub> -        | 1.73e+00 <sub>(3.2e-01)</sub> - | <b>7.23e-03</b> <sub>(1.6e-03)</sub> + | 2.22e-02 <sub>(1.5e-02)</sub>        |
|                | (10, 10)        | 1.36E-1 <sub>(1.7E-2)</sub> -  | 8.52E-2 <sub>(2.0E-2)</sub> -        | 2.97E-1 <sub>(1.6E-2)</sub> - | 2.88E-1 <sub>(2.9E-2)</sub> -        | 3.81E-2 <sub>(1.4E-2)</sub> -        | 1.65e+00 <sub>(3.1e-01)</sub> - | <b>7.65e-03</b> <sub>(1.4e-03)</sub> + | 1.96e-02 <sub>(1.3e-02)</sub>        |
|                | (20, 10)        | 3.55E-2 <sub>(1.3E-2)</sub> -  | 5.46E-2 <sub>(1.6E-2)</sub> -        | 2.84E-1 <sub>(1.5E-2)</sub> - | 1.34E-1 <sub>(9.2E-3)</sub> -        | 2.02E-2 <sub>(1.2E-2)</sub> -        | 1.59e+00 <sub>(2.8e-01)</sub> - | <b>4.82e-03</b> <sub>(5.1e-04)</sub> + | 1.40e-02 <sub>(5.8e-03)</sub>        |
| <b>FDA2</b>    | (5, 10)         | 4.71E-2 <sub>(1.4E-2)</sub> +  | 1.85E-1 <sub>(6.4E-2)</sub> +        | 3.21E-1 <sub>(6.7E-2)</sub> + | 1.30E-1 <sub>(2.5E-2)</sub> +        | <b>2.54E-2</b> <sub>(1.3E-2)</sub> + | 1.34e+02 <sub>(2.1e+01)</sub> - | 1.09e+01 <sub>(8.1e+00)</sub> -        | 7.96e-01 <sub>(1.1e+00)</sub>        |
|                | (10, 10)        | 2.05E-2 <sub>(1.4E-2)</sub> +  | 1.24E-1 <sub>(4.6E-2)</sub> +        | 2.66E-1 <sub>(1.4E-2)</sub> + | 6.29E-2 <sub>(1.8E-2)</sub> +        | <b>1.67E-2</b> <sub>(1.4E-2)</sub> + | 1.37e+02 <sub>(2.4e+01)</sub> - | 1.21e+01 <sub>(9.9e+00)</sub> -        | 4.33e+00 <sub>(1.2e+01)</sub>        |
|                | (20, 10)        | 1.33E-2 <sub>(1.4E-2)</sub> +  | 8.64E-2 <sub>(7.0E-2)</sub> +        | 2.55E-1 <sub>(9.4E-3)</sub> + | 3.24E-2 <sub>(1.4E-2)</sub> +        | <b>1.23E-2</b> <sub>(1.4E-2)</sub> + | 1.27e+02 <sub>(1.9e+01)</sub> - | 1.38e+01 <sub>(1.1e+01)</sub> -        | 1.60e+00 <sub>(3.9e+00)</sub>        |
| <b>FDA3</b>    | (5, 10)         | 1.54E+0 <sub>(1.6E-1)</sub> -  | 1.45E+0 <sub>(8.5E-2)</sub> -        | 1.75E+0 <sub>(1.8E-1)</sub> - | 1.66E+0 <sub>(7.8E-2)</sub> -        | 9.80E-1 <sub>(1.0E-1)</sub> -        | 2.04e+00 <sub>(2.0e+00)</sub> - | <b>3.85e-01</b> <sub>(9.1e-02)</sub> + | 4.89e-01 <sub>(2.3e-01)</sub>        |
|                | (10, 10)        | 1.09E+0 <sub>(9.9E-2)</sub> -  | 1.32E+0 <sub>(7.7E-2)</sub> -        | 1.16E+0 <sub>(4.6E-2)</sub> - | 1.12E+0 <sub>(9.3E-2)</sub> -        | 9.24E-1 <sub>(8.2E-2)</sub> -        | 3.32e+00 <sub>(1.8e+00)</sub> - | <b>4.30e-01</b> <sub>(1.4e-01)</sub> + | 6.24e-01 <sub>(2.9e-01)</sub>        |
|                | (20, 10)        | 1.04E+0 <sub>(7.9E-2)</sub> -  | 1.15E+0 <sub>(6.6E-2)</sub> -        | 1.03E+0 <sub>(7.4E-2)</sub> - | 9.47E-1 <sub>(2.2E-2)</sub> -        | 9.11E-1 <sub>(8.1E-2)</sub> -        | 2.57e+00 <sub>(1.7e+00)</sub> - | <b>3.21e-01</b> <sub>(8.0e-02)</sub> + | 4.19e-01 <sub>(2.1e-01)</sub>        |
| <b>FDA4</b>    | (5, 10)         | 2.05E+0 <sub>(2.0E-1)</sub> -  | 3.80E-1 <sub>(2.6E-2)</sub> -        | 7.77E-1 <sub>(6.8E-2)</sub> - | 3.97E+0 <sub>(1.6E+0)</sub> -        | 1.03E+0 <sub>(1.3E-1)</sub> -        | 3.50e+00 <sub>(5.1e-01)</sub> - | 1.75e-01 <sub>(3.0e-02)</sub> -        | <b>7.92e-02</b> <sub>(2.8e-02)</sub> |
|                | (10, 10)        | 1.58E+0 <sub>(6.6E-2)</sub> -  | 2.70E-1 <sub>(3.5E-2)</sub> -        | 4.34E-1 <sub>(7.2E-2)</sub> - | 1.24E+0 <sub>(1.3E-1)</sub> -        | 2.74E-1 <sub>(2.4E-2)</sub> -        | 3.64e+00 <sub>(7.0e-01)</sub> - | 1.89e-01 <sub>(5.4e-02)</sub> -        | <b>3.67e-02</b> <sub>(2.9e-02)</sub> |
|                | (20, 10)        | 5.48E-1 <sub>(5.7E-2)</sub> -  | 1.80E-1 <sub>(2.4E-2)</sub> +        | 3.34E-1 <sub>(8.3E-3)</sub> - | 4.34E-1 <sub>(5.0E-2)</sub> -        | 1.44E-1 <sub>(2.0E-2)</sub> -        | 3.06e+00 <sub>(4.3e-01)</sub> - | 1.50e-01 <sub>(4.0e-02)</sub> -        | <b>6.82e-02</b> <sub>(4.8e-02)</sub> |
| <b>FDA5</b>    | (5, 10)         | 6.75E+0 <sub>(1.9E-1)</sub> -  | 2.76E+0 <sub>(2.8E-1)</sub> -        | 3.88E+0 <sub>(3.1E-1)</sub> - | 7.08E+0 <sub>(1.0E+0)</sub> -        | 2.70E+0 <sub>(2.2E-1)</sub> -        | 1.11e+00 <sub>(1.9e+00)</sub> - | 4.42e-01 <sub>(1.5e-08)</sub> -        | <b>2.56e-01</b> <sub>(1.4e-01)</sub> |
|                | (10, 10)        | 5.41E+0 <sub>(1.6E-1)</sub> -  | 2.37E+0 <sub>(2.7E-1)</sub> -        | 2.19E+0 <sub>(3.9E-1)</sub> - | 4.80E+0 <sub>(2.6E-1)</sub> -        | 1.88E+0 <sub>(9.3E-2)</sub> -        | 1.72e+00 <sub>(3.3e+00)</sub> - | 3.74e-01 <sub>(1.2e-08)</sub> -        | <b>1.87e-01</b> <sub>(1.4e-01)</sub> |
|                | (20, 10)        | 2.64E+0 <sub>(1.1E-1)</sub> -  | 2.02E+0 <sub>(1.8E-1)</sub> -        | 1.04E+0 <sub>(1.1E-1)</sub> - | 2.15E+0 <sub>(1.0E-1)</sub> -        | 1.78E+0 <sub>(7.1E-2)</sub> -        | 1.71e+00 <sub>(3.5e+00)</sub> - | 4.24e-01 <sub>(1.8e-08)</sub> -        | <b>2.48e-01</b> <sub>(1.3e-01)</sub> |
| <b>dMOP1</b>   | (5, 10)         | 3.93E-2 <sub>(3.81E-2)</sub> - | 1.73E-1 <sub>(3.3E-2)</sub> -        | 2.86E-1 <sub>(3.6E-1)</sub> - | 4.64E-2 <sub>(3.6E-2)</sub> -        | 3.75E-2 <sub>(2.5E-2)</sub> -        | 2.84e+00 <sub>(1.6e+00)</sub> - | 3.25e-01 <sub>(8.4e-04)</sub> -        | 4.14e-03 <sub>(3.1e-03)</sub>        |
|                | (10, 10)        | 2.28E-2 <sub>(2.0E-2)</sub> -  | 1.12E-1 <sub>(2.0E-2)</sub> -        | 9.27E-2 <sub>(1.3E-1)</sub> - | 2.57E-2 <sub>(1.5E-2)</sub> -        | <b>1.90E-2</b> <sub>(1.4E-2)</sub> + | 2.96e+00 <sub>(1.4e+00)</sub> - | 3.21e-01 <sub>(1.3e-03)</sub> -        | 1.99e-02 <sub>(1.1e-02)</sub>        |
|                | (20, 10)        | 1.71E-2 <sub>(1.4E-2)</sub> -  | 5.65E-2 <sub>(8.1E-3)</sub> -        | 6.02E-2 <sub>(8.1E-2)</sub> - | <b>1.59E-2</b> <sub>(7.9E-3)</sub> + | 1.80E-2 <sub>(1.3E-2)</sub> -        | 2.44e+00 <sub>(1.7e+00)</sub> - | 3.28e-01 <sub>(7.7e-04)</sub> -        | 1.92e-02 <sub>(1.1e-02)</sub>        |
| <b>dMOP2</b>   | (5, 10)         | 8.06E-1 <sub>(1.1E-1)</sub> -  | 3.03E-1 <sub>(4.9E-2)</sub> -        | 3.95E-1 <sub>(3.9E-2)</sub> - | 9.04E-1 <sub>(7.3E-2)</sub> -        | 8.71E-2 <sub>(1.9E-2)</sub> -        | 2.58e+00 <sub>(1.6e+00)</sub> - | 1.03e-01 <sub>(1.9e-03)</sub> -        | <b>6.22e-02</b> <sub>(4.2e-02)</sub> |
|                | (10, 10)        | 2.90E-1 <sub>(2.5E-2)</sub> -  | 2.07E-1 <sub>(2.4E-2)</sub> -        | 1.17E-1 <sub>(4.3E-2)</sub> - | 4.46E-1 <sub>(4.2E-2)</sub> -        | <b>3.59E-2</b> <sub>(1.1E-2)</sub> + | 2.66e+00 <sub>(1.6e+00)</sub> - | 9.92e-02 <sub>(1.8e-03)</sub> -        | 5.10e-02 <sub>(4.4e-02)</sub>        |
|                | (20, 10)        | 4.50E-2 <sub>(1.2E-2)</sub> -  | 1.09E-1 <sub>(1.5E-2)</sub> -        | 5.65E-2 <sub>(6.2E-3)</sub> - | 1.98E-1 <sub>(1.4E-2)</sub> -        | <b>1.85E-2</b> <sub>(1.1E-2)</sub> + | 2.04e+00 <sub>(1.6e+00)</sub> - | 1.00e-01 <sub>(9.7e-04)</sub> -        | 1.90e-02 <sub>(1.5e-02)</sub>        |
| <b>dMOP3</b>   | (5, 10)         | 9.51E-1 <sub>(3.4E-2)</sub> +  | <b>1.05E-1</b> <sub>(1.6E-2)</sub> + | 4.22E-1 <sub>(1.5E-2)</sub> + | 7.61E-1 <sub>(5.3E-2)</sub> +        | 4.07E-1 <sub>(2.4E-2)</sub> +        | 1.59e+01 <sub>(5.6e-01)</sub> + | 1.62e+01 <sub>(3.1e-01)</sub> +        | 1.84e+01 <sub>(3.4e+00)</sub>        |
|                | (10, 10)        | 4.74E-1 <sub>(2.8E-2)</sub> -  | <b>6.57E-2</b> <sub>(1.3E-2)</sub> + | 2.79E-1 <sub>(2.7E-2)</sub> - | 4.54E-1 <sub>(2.8E-2)</sub> -        | 3.18E-1 <sub>(2.9E-2)</sub> -        | 2.98e+00 <sub>(4.7e-01)</sub> - | 2.36e+00 <sub>(4.8e-01)</sub> -        | <b>1.68e-01</b> <sub>(9.9e-02)</sub> |
|                | (20, 10)        | 2.76E-1 <sub>(2.5E-2)</sub> -  | <b>3.63E-2</b> <sub>(1.3E-2)</sub> + | 2.21E-1 <sub>(1.5E-2)</sub> - | 2.87E-1 <sub>(2.0E-2)</sub> -        | 2.15E-1 <sub>(3.0E-2)</sub> -        | 3.07e+00 <sub>(5.9e-01)</sub> - | 2.38e+00 <sub>(3.9e-01)</sub> -        | <b>1.31e-01</b> <sub>(9.4e-02)</sub> |
| +/-/ $\approx$ |                 | <b>4/20/0</b>                  | <b>7/17/1</b>                        | <b>4/20/0</b>                 | <b>5/19/0</b>                        | <b>6/18/0</b>                        | <b>1/23/0</b>                   | <b>7/17/0</b>                          |                                      |

The symbols “+”, “ $\approx$ ” and “-” denote that the performance of the compared algorithm is statistically better than, equivalent to, and worse than **DB-CSA**.

**Table S4.** IGD results (Mean and Standard Deviation) for UDF and F(ZJZ) functions with ( $\tau_t = n_t=10$ ).

|             | Reference: [12]               |                               |                                      |                               |                               | CSA                                    | DB-CSA (without Dynamic Process) | DB-CSA-II (with Dynamic Process)     |
|-------------|-------------------------------|-------------------------------|--------------------------------------|-------------------------------|-------------------------------|----------------------------------------|----------------------------------|--------------------------------------|
| Prob.       | DNSGA-II                      | dCOEA                         | PPS                                  | MOEA/D                        | SGEA                          |                                        |                                  |                                      |
| <b>UDF1</b> | 1.07E-1 <sub>(2.4E-2)</sub> - | 2.91E-1 <sub>(2.3E-2)</sub> - | 2.67E-1 <sub>(2.2E-2)</sub> -        | 1.70E-1 <sub>(5.1E-2)</sub> - | 1.24E-1 <sub>(3.3E-2)</sub> - | 2.22e-02 <sub>(1.1e-07)</sub> -        | 2.22e-02 <sub>(2.1e-07)</sub> -  | <b>6.57e-05</b> <sub>(5.1e-06)</sub> |
| <b>UDF2</b> | 1.12E-1 <sub>(1.0E-2)</sub> - | 1.83E-1 <sub>(2.0E-2)</sub> - | 2.54E-2 <sub>(5.0E-3)</sub> -        | 1.16E-1 <sub>(9.5E-3)</sub> - | 8.95E-2 <sub>(1.3E-2)</sub> - | 2.23e-02 <sub>(8.8e-08)</sub> -        | 2.23e-02 <sub>(9.9e-08)</sub> -  | <b>6.74e-05</b> <sub>(3.9e-06)</sub> |
| <b>UDF3</b> | 6.06E-1 <sub>(3.3E-6)</sub> - | 6.51E-1 <sub>(7.7E-2)</sub> - | 4.55E+0 <sub>(1.1E+0)</sub> -        | 6.06E-1 <sub>(6.3E-5)</sub> - | 6.06E-1 <sub>(7.4E-6)</sub> - | <b>3.62e-05</b> <sub>(2.2e-06)</sub> + | 3.73e-05 <sub>(2.3e-06)</sub> -  | 3.68e-05 <sub>(2.1e-06)</sub>        |
| <b>UDF4</b> | 1.70E-1 <sub>(4.7E-2)</sub> - | 2.87E-1 <sub>(2.8E-2)</sub> - | 1.85E-1 <sub>(8.2E-3)</sub> -        | 3.19E-1 <sub>(1.3E-1)</sub> - | 1.68E-1 <sub>(4.4E-2)</sub> - | 9.60e-05 <sub>(1.2e-06)</sub> -        | 9.70e-05 <sub>(1.2e-06)</sub> -  | <b>3.07e-05</b> <sub>(2.0e-06)</sub> |
| <b>UDF5</b> | 1.18E-1 <sub>(1.2E-2)</sub> - | 2.05E-1 <sub>(3.5E-2)</sub> - | 2.89E-2 <sub>(1.3E-2)</sub> -        | 1.61E-1 <sub>(1.4E-2)</sub> - | 1.00E-1 <sub>(1.1E-2)</sub> - | 9.82e-05 <sub>(1.1e-06)</sub> -        | 9.94e-05 <sub>(1.6e-06)</sub> -  | <b>3.20e-05</b> <sub>(2.2e-06)</sub> |
| <b>UDF6</b> | 4.57E-1 <sub>(8.7E-2)</sub> - | 8.04E-1 <sub>(1.0E-1)</sub> - | 1.34E+0 <sub>(7.1E-2)</sub> -        | 5.31E-1 <sub>(1.6E-1)</sub> - | 6.68E-1 <sub>(2.0E-1)</sub> - | 4.83e+00 <sub>(5.4e-05)</sub> -        | 4.83e+00 <sub>(3.4e-04)</sub> -  | <b>1.48e-03</b> <sub>(9.1e-04)</sub> |
| <b>UDF7</b> | 5.24E-1 <sub>(2.2E-2)</sub> - | 8.40E-1 <sub>(6.4E-2)</sub> - | 6.68E-1 <sub>(4.4E-2)</sub> -        | 5.08E-1 <sub>(1.4E-1)</sub> - | 5.08E-1 <sub>(4.2E-2)</sub> - | 4.93e-01 <sub>(2.5e-03)</sub> -        | 4.85e-01 <sub>(2.1e-08)</sub> -  | <b>1.80e-03</b> <sub>(1.1e-04)</sub> |
| <b>F5</b>   | 7.82E-1 <sub>(3.9E-2)</sub> - | 8.01E-1 <sub>(2.2E-1)</sub> - | 2.69E-1 <sub>(4.3E-2)</sub> -        | 6.88E-1 <sub>(4.1E-2)</sub> - | 4.41E-1 <sub>(4.5E-2)</sub> - | 9.11e-02 <sub>(1.5e-02)</sub> -        | 1.12e-01 <sub>(1.3e-02)</sub> -  | <b>4.16e-02</b> <sub>(9.5e-03)</sub> |
| <b>F6</b>   | 3.02E-1 <sub>(2.1E-2)</sub> - | 6.57E-1 <sub>(1.3E-1)</sub> - | 2.60E-1 <sub>(6.5E-2)</sub> -        | 3.44E-1 <sub>(5.6E-2)</sub> - | 2.90E-1 <sub>(1.3E-2)</sub> - | 6.03e+00 <sub>(1.6e+00)</sub> -        | 4.41e+00 <sub>(3.5e+00)</sub> -  | <b>2.36e-01</b> <sub>(1.9e-01)</sub> |
| <b>F7</b>   | 4.19E-1 <sub>(6.9E-3)</sub> - | 1.56E+0 <sub>(6.0E-1)</sub> - | 2.63E-1 <sub>(7.1E-2)</sub> -        | 4.18E-1 <sub>(6.0E-2)</sub> - | 4.47E-1 <sub>(1.0E-2)</sub> - | 5.60e-02 <sub>(2.7e-03)</sub> -        | 5.64e-02 <sub>(1.7e-03)</sub> -  | <b>1.94e-02</b> <sub>(6.6e-03)</sub> |
| <b>F8</b>   | 4.86E-1 <sub>(1.3E-2)</sub> - | 4.00E-1 <sub>(6.7E-2)</sub> - | 4.56E-1 <sub>(3.1E-2)</sub> -        | 5.49E-1 <sub>(2.3E-2)</sub> - | 2.51E-1 <sub>(1.4E-1)</sub> - | 6.55e-03 <sub>(8.8e-04)</sub> -        | 4.48e-03 <sub>(4.1e-04)</sub> -  | <b>1.05e-03</b> <sub>(3.9e-05)</sub> |
| <b>F9</b>   | 4.74E-1 <sub>(2.1E-2)</sub> - | 8.87E-1 <sub>(3.3E-1)</sub> - | 3.59E-1 <sub>(4.4E-2)</sub> -        | 4.29E-1 <sub>(2.4E-2)</sub> - | 3.65E-1 <sub>(3.4E-2)</sub> - | 6.12e-02 <sub>(7.4e-03)</sub> -        | 7.02e-02 <sub>(7.6e-03)</sub> -  | <b>2.85e-02</b> <sub>(1.1e-02)</sub> |
| <b>F10</b>  | 1.05E+0 <sub>(1.5E-1)</sub> - | 5.76E-1 <sub>(8.1E-2)</sub> + | <b>3.79E-1</b> <sub>(8.7E-2)</sub> + | 6.39E-1 <sub>(8.6E-2)</sub> - | 3.80E-1 <sub>(1.3E-2)</sub> + | 1.29e+00 <sub>(2.4e-01)</sub> -        | 1.03e+00 <sub>(1.7e-01)</sub> -  | 5.82e-01 <sub>(9.9e-02)</sub>        |
| +/-/≈       | <b>0/13/0</b>                 | <b>1/12/0</b>                 | <b>1/12/0</b>                        | <b>0/13/0</b>                 | <b>1/12/0</b>                 | <b>1/12/0</b>                          | <b>0/13/0</b>                    |                                      |

The symbols “+”, “≈” and “-” denote that the performance of the compared algorithm is statistically better than, equivalent to, and worse than **DB-CSA**

**Table S5.** HVD results (Mean and Standard Deviation) for UDF and F(ZJZ) functions with ( $\tau_t = n_t=10$ ).

| Prob.       | Reference: [12]               |                                      |                                      |                               |                                      | CSA                                    | DB-CSA (without Dynamic Process) | DB-CSA-II (with Dynamic Process)     |
|-------------|-------------------------------|--------------------------------------|--------------------------------------|-------------------------------|--------------------------------------|----------------------------------------|----------------------------------|--------------------------------------|
|             | DNSGA-II                      | dCOEA                                | PPS                                  | MOEA/D                        | SGEA                                 |                                        |                                  |                                      |
| <b>UDF1</b> | 5.14E-1 <sub>(3.2E-2)</sub> - | 7.47E-1 <sub>(3.8E-2)</sub> -        | 7.97E-1 <sub>(5.2E-2)</sub> -        | 6.12E-1 <sub>(9.4E-2)</sub> - | 5.18E-1 <sub>(5.0E-2)</sub> -        | 2.98e+00 <sub>(6.2e-03)</sub> -        | 2.98e+00 <sub>(4.4e-03)</sub> -  | <b>4.57e-03</b> <sub>(3.2e-04)</sub> |
| <b>UDF2</b> | 5.51E-1 <sub>(2.4E-2)</sub> - | 6.13E-1 <sub>(2.8E-2)</sub> -        | 4.32E-1 <sub>(1.9E-2)</sub> -        | 5.42E-1 <sub>(1.7E-2)</sub> - | 5.10E-1 <sub>(2.5E-2)</sub> -        | 2.98e+00 <sub>(5.3e-03)</sub> -        | 2.98e+00 <sub>(3.6e-03)</sub> -  | <b>4.67e-03</b> <sub>(2.3e-04)</sub> |
| <b>UDF3</b> | 1.22E+0 <sub>(1.9E-3)</sub> - | 1.23E+0 <sub>(7.0E-2)</sub> -        | 1.73E+0 <sub>(3.1E-4)</sub> -        | 1.22E+0 <sub>(2.4E-3)</sub> - | 1.22E+0 <sub>(2.4E-3)</sub> -        | <b>4.69e-03</b> <sub>(2.5e-04)</sub> + | 4.81e-03 <sub>(2.5e-04)</sub> -  | 4.76e-03 <sub>(2.4e-04)</sub>        |
| <b>UDF4</b> | 3.47E-1 <sub>(8.3E-2)</sub> - | 5.06E-1 <sub>(3.7E-2)</sub> -        | 3.77E-1 <sub>(2.1E-2)</sub> -        | 6.41E-1 <sub>(1.9E-1)</sub> - | 3.32E-1 <sub>(7.1E-2)</sub> -        | 2.49e-02 <sub>(4.7e-04)</sub> -        | 2.45e-02 <sub>(3.4e-04)</sub> -  | <b>4.67e-04</b> <sub>(3.1e-04)</sub> |
| <b>UDF5</b> | 2.78E-1 <sub>(2.5E-2)</sub> - | 3.98E-1 <sub>(3.3E-2)</sub> -        | 2.70E-1 <sub>(1.5E-2)</sub> -        | 3.65E-1 <sub>(2.7E-2)</sub> - | 2.72E-1 <sub>(1.8E-2)</sub> -        | 2.47e-02 <sub>(3.8e-04)</sub> -        | 2.42e-02 <sub>(5.7e-04)</sub> -  | <b>4.60e-04</b> <sub>(2.9e-04)</sub> |
| <b>UDF6</b> | 9.34E-1 <sub>(1.5E-1)</sub> - | 1.26E+0 <sub>(7.2E-2)</sub> -        | 1.83E+0 <sub>(1.0E-2)</sub> -        | 1.21E+0 <sub>(1.4E-1)</sub> - | 9.77E-1 <sub>(2.0E-1)</sub> -        | 3.92e+02 <sub>(3.6e+00)</sub> -        | 3.95e+02 <sub>(2.1e+00)</sub> -  | <b>8.73e-03</b> <sub>(2.5e-03)</sub> |
| <b>UDF7</b> | 2.40E+0 <sub>(7.4E-2)</sub> - | <b>1.91E+0</b> <sub>(1.7E-1)</sub> + | 2.06E+0 <sub>(5.4E-2)</sub> -        | 2.32E+0 <sub>(2.4E-1)</sub> - | 2.06E+0 <sub>(1.2E-1)</sub> -        | 5.39e+00 <sub>(7.9e-01)</sub> -        | 4.55e+00 <sub>(1.2e-01)</sub> -  | <b>2.31e+00</b> <sub>(1.4e+00)</sub> |
| <b>F5</b>   | 1.25E+0 <sub>(2.5E-2)</sub> + | 1.10E+0 <sub>(1.6E-1)</sub> +        | <b>4.01E-1</b> <sub>(9.9E-2)</sub> + | 1.19E+0 <sub>(2.9E-2)</sub> + | 7.16E-1 <sub>(8.2E-2)</sub> +        | 3.52e+01 <sub>(2.3e+01)</sub> -        | 6.17e+01 <sub>(1.2e+01)</sub> -  | 3.00e+01 <sub>(2.0e+01)</sub>        |
| <b>F6</b>   | 4.76E-1 <sub>(3.7E-2)</sub> + | 9.22E-1 <sub>(1.0E-1)</sub> +        | 4.92E-1 <sub>(1.5E-1)</sub> +        | 5.75E-1 <sub>(7.5E-2)</sub> + | <b>3.60E-1</b> <sub>(2.5E-2)</sub> + | 3.80e+02 <sub>(1.7e+02)</sub> -        | 1.74e+02 <sub>(1.4e+02)</sub> -  | 5.01e+01 <sub>(3.2e+01)</sub>        |
| <b>F7</b>   | 6.49E-1 <sub>(1.0E-2)</sub> + | 1.22E+0 <sub>(1.5E-1)</sub> +        | <b>4.49E-1</b> <sub>(1.4E-1)</sub> + | 6.50E-1 <sub>(2.8E-2)</sub> + | 6.05E-1 <sub>(1.5E-2)</sub> +        | 7.65e+01 <sub>(1.7e+01)</sub> +        | 7.41e+01 <sub>(1.8e+00)</sub> +  | 1.12e+02 <sub>(4.9e+01)</sub>        |
| <b>F8</b>   | 1.06E+0 <sub>(4.6E-2)</sub> - | 8.85E-1 <sub>(1.2E-1)</sub> -        | 1.34E+0 <sub>(1.0E-1)</sub> -        | 1.06E+0 <sub>(6.6E-2)</sub> - | 4.57E-1 <sub>(3.2E-2)</sub> -        | 4.89e-01 <sub>(8.7e-02)</sub> -        | 2.53e-01 <sub>(1.5e-01)</sub> -  | <b>5.70e-02</b> <sub>(1.0e-02)</sub> |
| <b>F9</b>   | 8.87E-1 <sub>(3.4E-2)</sub> + | 1.07E+0 <sub>(1.9E-1)</sub> +        | 6.88E-1 <sub>(7.7E-2)</sub> +        | 8.58E-1 <sub>(4.6E-2)</sub> + | <b>5.76E-1</b> <sub>(7.0E-2)</sub> + | 5.97e+01 <sub>(2.2e+01)</sub> -        | 8.57e+01 <sub>(2.1e+01)</sub> -  | 2.70e+01 <sub>(1.8e+01)</sub>        |
| <b>F10</b>  | 1.22E+0 <sub>(5.0E-2)</sub> + | 8.58E-1 <sub>(8.8E-2)</sub> +        | <b>5.38E-1</b> <sub>(1.2E-1)</sub> + | 1.05E+0 <sub>(5.9E-2)</sub> + | 5.77E-1 <sub>(2.3E-2)</sub> +        | 6.15e+01 <sub>(4.1e+01)</sub> +        | 1.39e+01 <sub>(1.8e+01)</sub> +  | 9.95e+01 <sub>(2.9e+01)</sub>        |
| +/-/≈       | <b>5/8/0</b>                  | <b>6/7/0</b>                         | <b>5/8/0</b>                         | <b>5/8/0</b>                  | <b>5/8/0</b>                         | <b>3/10/0</b>                          | <b>2/11/0</b>                    |                                      |

The symbols “+”, “≈” and “-” denote that the performance of the compared algorithm is statistically better than, equivalent to, and worse than **DB-CSA**

**Table S6.** IGD results (Mean and Standard Deviation) of the 13 MOEAs [56] compared to DB-CSA on the 2, 3 and 7 objectives WFG problems.

| MOEAs         | M | WFG1                                | WFG2                                 | WFG3                                | WFG4                                | WFG5                                | WFG6                                | WFG7                                 | WFG8                                | WFG9                                | +/- $\approx$ |
|---------------|---|-------------------------------------|--------------------------------------|-------------------------------------|-------------------------------------|-------------------------------------|-------------------------------------|--------------------------------------|-------------------------------------|-------------------------------------|---------------|
| MSOPS-II      | 2 | 2.11E-1 <sub>(9.9E-2)</sub> -       | 2.68E-2 <sub>(3.18E-3)</sub> -       | 1.68E-2 <sub>(9.87E-3)</sub> -      | 1.80E-2 <sub>(1.16E-3)</sub> -      | 6.61E-2 <sub>(4.58E-4)</sub> -      | 7.66E-2 <sub>(2.14E-2)</sub> -      | 1.91E-2 <sub>(1.42E-3)</sub> -       | 1.13E-1 <sub>(2.64E-3)</sub> -      | 4.76E-2 <sub>(7.28E-2)</sub> -      | <b>0/27/0</b> |
|               | 3 | 3.86E-1 <sub>(7.13E-2)</sub> -      | 2.73E-1 <sub>(3.40E-2)</sub> -       | 9.79E-2 <sub>(2.44E-2)</sub> -      | 2.60E-1 <sub>(9.62E-3)</sub> -      | 2.80E-1 <sub>(9.31E-3)</sub> -      | 3.20E-1 <sub>(1.71E-2)</sub> -      | 2.71E-1 <sub>(1.35E-2)</sub> -       | 3.91E-1 <sub>(1.25E-2)</sub> -      | 2.56E-1 <sub>(3.01E-2)</sub> -      |               |
|               | 7 | 1.17E+0 <sub>(9.67E-2)</sub> -      | 3.14E+0 <sub>(7.86E-1)</sub> -       | 1.85E-1 <sub>(4.01E-2)</sub> -      | 2.78E+0 <sub>(3.14E-2)</sub> -      | 2.92E+0 <sub>(8.1E-2)</sub> -       | 2.92E+0 <sub>(5.6E-2)</sub> -       | 2.92E+0 <sub>(6.22E-2)</sub> -       | 2.99E+0 <sub>(4.0E-2)</sub> -       | 2.75E+0 <sub>(3.9E-2)</sub> -       |               |
| MOEA/D        | 2 | 5.28E-1 <sub>(5.95E-2)</sub> -      | 1.09E-1 <sub>(6.86E-3)</sub> -       | 2.68E-2 <sub>(4.78E-3)</sub> -      | 3.60E-2 <sub>(4.78E-3)</sub> -      | 7.23E-2 <sub>(2.32E-2)</sub> -      | 9.55E-2 <sub>(2.32E-2)</sub> -      | 3.35E-2 <sub>(3.34E-3)</sub> -       | 1.27E-1 <sub>(5.63E-3)</sub> -      | 7.41E-2 <sub>(5.48E-2)</sub> -      | <b>0/27/0</b> |
|               | 3 | 6.52E-1 <sub>(9.52E-2)</sub> -      | 1.02E+0 <sub>(3.31E-2)</sub> -       | 2.05E-1 <sub>(5.78E-2)</sub> -      | 2.63E-1 <sub>(5.94E-3)</sub> -      | 2.51E-1 <sub>(3.69E-3)</sub> -      | 2.99E-1 <sub>(8.25E-3)</sub> -      | 3.73E-1 <sub>(4.54E-2)</sub> -       | 3.25E-1 <sub>(1.10E-2)</sub> -      | 3.03E-1 <sub>(3.76E-2)</sub> -      |               |
|               | 7 | 2.12E+0 <sub>(2.52E-1)</sub> -      | 1.06E+1 <sub>(1.18E-1)</sub> -       | 3.05E+0 <sub>(1.7E-1)</sub> -       | 6.00E+0 <sub>(1.65E-1)</sub> -      | 5.73E+0 <sub>(1.3E-1)</sub> -       | 6.18E+0 <sub>(1.4E-1)</sub> -       | 6.10E+0 <sub>(1.34E-1)</sub> -       | 5.37E+0 <sub>(1.5E-1)</sub> -       | 5.57E+0 <sub>(4.4E-1)</sub> -       |               |
| HypE          | 2 | 7.27E-1 <sub>(1.53E-1)</sub> -      | <b>1.08E-2</b> <sub>(2.8E-4)</sub> + | 1.12E-2 <sub>(3.48E-4)</sub> -      | 1.78E-2 <sub>(1.24E-3)</sub> -      | 6.69E-2 <sub>(1.48E-3)</sub> -      | 8.11E-2 <sub>(2.09E-2)</sub> -      | 1.79E-2 <sub>(8.14E-4)</sub> -       | 1.11E-1 <sub>(3.79E-3)</sub> -      | 2.07E-2 <sub>(1.00E-3)</sub> -      | <b>1/26/0</b> |
|               | 3 | 1.33E+0 <sub>(1.22E-1)</sub> -      | 2.71E-1 <sub>(4.30E-2)</sub> -       | 3.72E-2 <sub>(3.53E-3)</sub> -      | 3.33E-1 <sub>(1.48E-2)</sub> -      | 3.62E-1 <sub>(1.19E-2)</sub> -      | 3.72E-1 <sub>(2.28E-2)</sub> -      | 3.83E-1 <sub>(1.44E-2)</sub> -       | 3.72E-1 <sub>(1.41E-2)</sub> -      | 3.62E-1 <sub>(1.31E-2)</sub> -      |               |
|               | 7 | 2.53E+0 <sub>(1.31E-1)</sub> -      | 3.89E+0 <sub>(6.24E-1)</sub> -       | 9.29E-2 <sub>(9.16E-3)</sub> -      | 4.43E+0 <sub>(5.97E-1)</sub> -      | 2.91E+0 <sub>(7.70E-2)</sub> -      | 2.95E+0 <sub>(1.3E-1)</sub> -       | 3.21E+0 <sub>(2.53E-1)</sub> -       | 3.39E+0 <sub>(1.9E-1)</sub> -       | 2.89E+0 <sub>(2.0E-1)</sub> -       |               |
| PICEA-g       | 2 | 2.04E-1 <sub>(3.63E-2)</sub> -      | 2.59E-2 <sub>(4.83E-3)</sub> -       | 1.81E-2 <sub>(1.67E-3)</sub> -      | 1.85E-2 <sub>(1.97E-3)</sub> -      | 6.59E-2 <sub>(2.22E-3)</sub> -      | 9.55E-2 <sub>(1.99E-2)</sub> -      | 1.60E-2 <sub>(9.18E-4)</sub> -       | 1.20E-1 <sub>(4.01E-3)</sub> -      | 4.25E-2 <sub>(5.09E-2)</sub> -      | <b>0/27/0</b> |
|               | 3 | 9.78E-1 <sub>(1.07E-1)</sub> -      | 1.54E-1 <sub>(9.67E-3)</sub> -       | 1.25E-1 <sub>(1.04E-2)</sub> -      | 2.23E-1 <sub>(3.05E-3)</sub> -      | 2.28E-1 <sub>(3.29E-3)</sub> -      | 2.63E-1 <sub>(2.14E-2)</sub> -      | 2.18E-1 <sub>(3.58E-3)</sub> -       | 3.09E-1 <sub>(4.52E-3)</sub> -      | 2.21E-1 <sub>(1.10E-2)</sub> -      |               |
|               | 7 | 2.46E+0 <sub>(5.1E-2)</sub> -       | 2.04E+0 <sub>(3.88E-1)</sub> -       | 8.76E-1 <sub>(8.43E-2)</sub> -      | 2.52E+0 <sub>(1.51E-1)</sub> -      | 2.46E+0 <sub>(1.9E-2)</sub> -       | 2.50E+0 <sub>(1.7E-2)</sub> -       | 2.47E+0 <sub>(1.69E-2)</sub> -       | 2.70E+0 <sub>(1.3E-1)</sub> -       | 2.54E+0 <sub>(4.7E-2)</sub> -       |               |
| SPEA2/SDE     | 2 | 1.93E-1 <sub>(4.81E-2)</sub> -      | 1.25E-2 <sub>(7.4E-4)</sub> +        | 1.37E-2 <sub>(3.66E-4)</sub> -      | 3.18E-2 <sub>(5.11E-3)</sub> -      | 7.82E-2 <sub>(4.69E-3)</sub> -      | 9.44E-2 <sub>(1.88E-2)</sub> -      | 3.54E-2 <sub>(5.56E-3)</sub> -       | 1.18E-1 <sub>(3.46E-3)</sub> -      | 3.55E-2 <sub>(5.90E-3)</sub> -      | <b>1/26/0</b> |
|               | 3 | 2.94E-1 <sub>(5.17E-2)</sub> -      | 2.47E-1 <sub>(5.53E-2)</sub> -       | 6.64E-2 <sub>(5.31E-3)</sub> -      | 3.28E-1 <sub>(1.37E-2)</sub> -      | 3.34E-1 <sub>(1.60E-2)</sub> -      | 3.55E-1 <sub>(1.97E-2)</sub> -      | 3.27E-1 <sub>(1.41E-2)</sub> -       | 3.61E-1 <sub>(1.11E-2)</sub> -      | 3.12E-1 <sub>(1.39E-2)</sub> -      |               |
|               | 7 | 1.13E+0 <sub>(9.70E-2)</sub> -      | 6.15E+0 <sub>(1.3E+0)</sub> -        | 1.25E+0 <sub>(4.5E-1)</sub> -       | 2.76E+0 <sub>(3.53E-2)</sub> -      | 2.75E+0 <sub>(4.9E-2)</sub> -       | 2.87E+0 <sub>(4.9E-2)</sub> -       | 2.79E+0 <sub>(4.18E-2)</sub> -       | 2.83E+0 <sub>(3.6E-2)</sub> -       | 2.67E+0 <sub>(3.1E-2)</sub> -       |               |
| GrEA          | 2 | 1.92E-1 <sub>(9.01E-2)</sub> -      | 3.14E-2 <sub>(2.06E-3)</sub> -       | 2.38E-2 <sub>(3.33E-4)</sub> -      | 2.60E-2 <sub>(1.42E-3)</sub> -      | 7.41E-2 <sub>(2.13E-3)</sub> -      | 8.08E-2 <sub>(2.56E-2)</sub> -      | 2.98E-2 <sub>(1.90E-3)</sub> -       | 1.12E-1 <sub>(9.73E-4)</sub> -      | 3.03E-2 <sub>(2.65E-3)</sub> -      | <b>0/27/0</b> |
|               | 3 | 3.04E-1 <sub>(4.41E-2)</sub> -      | 2.61E-1 <sub>(2.64E-2)</sub> -       | 9.10E-2 <sub>(8.78E-3)</sub> -      | 2.41E-1 <sub>(2.99E-3)</sub> -      | 2.61E-1 <sub>(4.44E-3)</sub> -      | 2.72E-1 <sub>(9.51E-3)</sub> -      | 2.55E-1 <sub>(9.13E-3)</sub> -       | 3.02E-1 <sub>(8.89E-3)</sub> -      | 2.39E-1 <sub>(5.39E-3)</sub> -      |               |
|               | 7 | 1.31E+0 <sub>(1.90E-1)</sub> -      | 3.00E+0 <sub>(6.88E-1)</sub> -       | 8.82E-1 <sub>(1.37E-1)</sub> -      | 2.47E+0 <sub>(1.66E-2)</sub> -      | 2.47E+0 <sub>(2.1E-2)</sub> -       | 2.52E+0 <sub>(2.3E-2)</sub> -       | 2.51E+0 <sub>(1.22E-2)</sub> -       | 2.59E+0 <sub>(2.5E-2)</sub> -       | 2.43E+0 <sub>(1.5E-2)</sub> -       |               |
| NSGA-III      | 2 | 2.70E-1 <sub>(5.03E-2)</sub> -      | 1.52E-2 <sub>(6.3E-4)</sub> +        | 1.35E-2 <sub>(8.46E-4)</sub> -      | 1.39E-2 <sub>(1.13E-3)</sub> -      | 6.44E-2 <sub>(1.01E-3)</sub> -      | 8.64E-2 <sub>(2.42E-2)</sub> -      | 1.27E-2 <sub>(2.4E-4)</sub> +        | 1.13E-1 <sub>(1.70E-3)</sub> -      | 2.30E-2 <sub>(1.97E-3)</sub> -      | <b>2/25/0</b> |
|               | 3 | 5.55E-1 <sub>(7.70E-2)</sub> -      | 1.82E-1 <sub>(5.38E-3)</sub> -       | 1.19E-1 <sub>(8.98E-3)</sub> -      | 2.22E-1 <sub>(9.79E-4)</sub> -      | 2.13E-1 <sub>(1.27E-2)</sub> -      | 2.51E-1 <sub>(1.27E-2)</sub> -      | 2.22E-1 <sub>(4.19E-4)</sub> -       | 2.95E-1 <sub>(5.07E-3)</sub> -      | 2.35E-1 <sub>(3.10E-2)</sub> -      |               |
|               | 7 | 1.58E+0 <sub>(1.43E-1)</sub> -      | 3.35E+0 <sub>(2.2E+0)</sub> -        | 1.21E+0 <sub>(2.9E-1)</sub> -       | 2.66E+0 <sub>(4.57E-2)</sub> -      | 2.60E+0 <sub>(7.9E-3)</sub> -       | 2.66E+0 <sub>(1.9E-2)</sub> -       | 2.66E+0 <sub>(9.73E-3)</sub> -       | 2.68E+0 <sub>(1.67E-1)</sub> -      | 2.54E+0 <sub>(1.9E-2)</sub> -       |               |
| KnEA          | 2 | 2.88E-1 <sub>(1.39E-1)</sub> -      | 9.19E-1 <sub>(2.70E-1)</sub> -       | 1.79E-2 <sub>(8.33E-4)</sub> -      | 2.52E-2 <sub>(4.50E-3)</sub> -      | 7.86E-2 <sub>(9.41E-3)</sub> -      | 3.09E-1 <sub>(6.94E-2)</sub> -      | 1.41E-1 <sub>(5.41E-2)</sub> -       | 5.02E-1 <sub>(7.25E-2)</sub> -      | 3.74E-2 <sub>(4.19E-2)</sub> -      | <b>0/27/0</b> |
|               | 3 | 3.79E-1 <sub>(5.38E-2)</sub> -      | 2.36E-1 <sub>(4.36E-2)</sub> -       | 1.36E-1 <sub>(5.76E-2)</sub> -      | 2.54E-1 <sub>(1.04E-2)</sub> -      | 2.68E-1 <sub>(1.54E-2)</sub> -      | 3.02E-1 <sub>(1.45E-2)</sub> -      | 2.52E-1 <sub>(1.36E-2)</sub> -       | 3.38E-1 <sub>(1.29E-2)</sub> -      | 2.29E-1 <sub>(5.63E-3)</sub> -      |               |
|               | 7 | 1.29E+0 <sub>(1.32E-1)</sub> -      | 2.16E+0 <sub>(3.84E-1)</sub> -       | 1.56E+0 <sub>(5.8E-1)</sub> -       | 2.83E+0 <sub>(3.81E-2)</sub> -      | 2.85E+0 <sub>(3.7E-2)</sub> -       | 3.04E+0 <sub>(8.7E-2)</sub> -       | 2.90E+0 <sub>(5.22E-2)</sub> -       | 2.87E+0 <sub>(7.35E-2)</sub> -      | 2.66E+0 <sub>(4.7E-2)</sub> -       |               |
| RVEA          | 2 | 5.81E-1 <sub>(4.75E-2)</sub> -      | 7.72E-2 <sub>(1.07E-2)</sub> -       | 5.79E-2 <sub>(1.04E-2)</sub> -      | 9.44E-2 <sub>(1.59E-2)</sub> -      | 1.01E-1 <sub>(1.40E-2)</sub> -      | 1.69E-1 <sub>(2.42E-2)</sub> -      | 6.65E-2 <sub>(1.26E-2)</sub> -       | 2.06E-1 <sub>(1.51E-2)</sub> -      | 6.04E-2 <sub>(5.71E-3)</sub> -      | <b>0/27/0</b> |
|               | 3 | 6.54E-1 <sub>(6.52E-2)</sub> -      | 2.17E-1 <sub>(2.05E-2)</sub> -       | 2.30E-1 <sub>(5.85E-3)</sub> -      | 2.43E-1 <sub>(1.96E-2)</sub> -      | 2.37E-1 <sub>(1.72E-3)</sub> -      | 2.72E-1 <sub>(1.72E-2)</sub> -      | 2.39E-1 <sub>(5.28E-3)</sub> -       | 3.28E-1 <sub>(1.62E-2)</sub> -      | 2.36E-1 <sub>(6.77E-3)</sub> -      |               |
|               | 7 | 1.37E+0 <sub>(1.27E-1)</sub> -      | 5.39E+0 <sub>(1.1E+0)</sub> -        | 1.93E+0 <sub>(5.3E-1)</sub> -       | 2.63E+0 <sub>(1.09E-2)</sub> -      | 2.62E+0 <sub>(8.8E-3)</sub> -       | 2.64E+0 <sub>(3.4E-2)</sub> -       | 2.65E+0 <sub>(1.85E-2)</sub> -       | 2.68E+0 <sub>(4.91E-2)</sub> -      | 2.57E+0 <sub>(3.1E-2)</sub> -       |               |
| Two-Arch2     | 2 | 2.57E-1 <sub>(9.01E-2)</sub> -      | 1.29E-2 <sub>(1.9E-3)</sub> +        | 1.47E-2 <sub>(1.46E-3)</sub> -      | 1.62E-2 <sub>(8.82E-4)</sub> -      | 6.59E-2 <sub>(2.36E-3)</sub> -      | 7.38E-2 <sub>(2.00E-2)</sub> -      | 1.62E-2 <sub>(2.69E-4)</sub> -       | 1.18E-1 <sub>(8.79E-3)</sub> -      | 2.02E-2 <sub>(2.34E-3)</sub> -      | <b>1/26/0</b> |
|               | 3 | 4.58E-1 <sub>(1.14E-1)</sub> -      | 1.53E-1 <sub>(3.41E-3)</sub> -       | 8.74E-2 <sub>(6.22E-3)</sub> -      | 2.27E-1 <sub>(5.49E-3)</sub> -      | 2.37E-1 <sub>(3.98E-3)</sub> -      | 2.53E-1 <sub>(1.38E-2)</sub> -      | 2.25E-1 <sub>(4.51E-3)</sub> -       | 3.11E-1 <sub>(5.61E-3)</sub> -      | 2.22E-1 <sub>(3.75E-3)</sub> -      |               |
|               | 7 | 1.62E+0 <sub>(1.57E-1)</sub> -      | 2.02E+0 <sub>(4.16E-1)</sub> -       | 9.56E-1 <sub>(1.15E-1)</sub> -      | 2.59E+0 <sub>(2.16E-2)</sub> -      | 2.54E+0 <sub>(2.4E-2)</sub> -       | 2.61E+0 <sub>(3.2E-2)</sub> -       | 2.56E+0 <sub>(2.17E-2)</sub> -       | 2.87E+0 <sub>(3.88E-2)</sub> -      | 2.58E+0 <sub>(3.7E-2)</sub> -       |               |
| $\theta$ -DEA | 2 | 2.70E-1 <sub>(8.29E-2)</sub> -      | 3.02E-2 <sub>(4.77E-2)</sub> -       | 1.29E-2 <sub>(5.23E-4)</sub> -      | 1.40E-2 <sub>(1.21E-3)</sub> -      | 6.52E-2 <sub>(2.14E-3)</sub> -      | 8.09E-2 <sub>(1.42E-2)</sub> -      | <b>1.27E-2</b> <sub>(1.9E-4)</sub> + | 1.15E-1 <sub>(3.42E-3)</sub> -      | 2.18E-2 <sub>(2.34E-3)</sub> -      | <b>1/26/0</b> |
|               | 3 | 4.75E-1 <sub>(6.57E-2)</sub> -      | 2.10E-1 <sub>(2.24E-2)</sub> -       | 1.34E-1 <sub>(1.84E-2)</sub> -      | 2.22E-1 <sub>(5.44E-4)</sub> -      | 2.30E-1 <sub>(8.14E-4)</sub> -      | 2.46E-1 <sub>(1.13E-2)</sub> -      | 2.22E-1 <sub>(4.77E-4)</sub> -       | 2.93E-1 <sub>(4.59E-3)</sub> -      | 2.32E-1 <sub>(3.04E-2)</sub> -      |               |
|               | 7 | 1.29E+0 <sub>(2.93E-1)</sub> -      | 3.60E+0 <sub>(1.7E+0)</sub> -        | 1.22E+0 <sub>(2.0E-1)</sub> -       | 2.65E+0 <sub>(1.08E-2)</sub> -      | 2.61E+0 <sub>(7.9E-3)</sub> -       | 2.65E+0 <sub>(1.6E-2)</sub> -       | 2.66E+0 <sub>(1.14E-2)</sub> -       | 2.61E+0 <sub>(1.21E-2)</sub> -      | 2.54E+0 <sub>(7.8E-3)</sub> -       |               |
| MOEA/DD       | 2 | 3.11E-1 <sub>(3.60E-2)</sub> -      | 2.48E-2 <sub>(1.68E-3)</sub> -       | 1.58E-2 <sub>(1.21E-3)</sub> -      | 1.43E-2 <sub>(4.79E-4)</sub> -      | 6.71E-2 <sub>(2.75E-3)</sub> -      | 8.35E-2 <sub>(1.87E-2)</sub> -      | 1.39E-2 <sub>(3.5E-4)</sub> +        | 1.10E-1 <sub>(1.98E-3)</sub> -      | 2.21E-2 <sub>(2.23E-3)</sub> -      | <b>1/26/0</b> |
|               | 3 | 1.02E+0 <sub>(1.49E-1)</sub> -      | 4.85E-1 <sub>(1.11E-1)</sub> -       | 2.61E-1 <sub>(1.01E-1)</sub> -      | 2.41E-1 <sub>(9.34E-4)</sub> -      | 2.46E-1 <sub>(1.68E-3)</sub> -      | 2.61E-1 <sub>(1.29E-2)</sub> -      | 2.44E-1 <sub>(1.85E-3)</sub> -       | 3.05E-1 <sub>(3.66E-3)</sub> -      | 2.39E-1 <sub>(1.92E-3)</sub> -      |               |
|               | 7 | 1.86E+0 <sub>(1.17E-1)</sub> -      | 8.91E+0 <sub>(2.73E-1)</sub> -       | 1.78E+0 <sub>(1.4E-1)</sub> -       | 2.93E+0 <sub>(7.84E-2)</sub> -      | 3.05E+0 <sub>(1.1E-1)</sub> -       | 2.98E+0 <sub>(9.4E-2)</sub> -       | 2.93E+0 <sub>(1.13E-1)</sub> -       | 2.83E+0 <sub>(2.01E-2)</sub> -      | 3.11E+0 <sub>(1.2E-1)</sub> -       |               |
| AnD           | 2 | 2.84E-1 <sub>(2.60E-2)</sub> -      | 3.03E-2 <sub>(3.96E-3)</sub> -       | 1.90E-2 <sub>(1.64E-3)</sub> -      | 1.98E-2 <sub>(2.00E-3)</sub> -      | 6.69E-2 <sub>(1.91E-3)</sub> -      | 8.42E-2 <sub>(1.87E-2)</sub> -      | 1.97E-2 <sub>(1.68E-3)</sub> -       | 1.18E-1 <sub>(2.65E-3)</sub> -      | 2.89E-2 <sub>(3.46E-3)</sub> -      | <b>0/27/0</b> |
|               | 3 | 4.79E-1 <sub>(4.94E-2)</sub> -      | 2.49E-1 <sub>(2.26E-2)</sub> -       | 1.54E-1 <sub>(1.87E-2)</sub> -      | 2.28E-1 <sub>(6.08E-3)</sub> -      | 2.38E-1 <sub>(4.09E-3)</sub> -      | 2.55E-1 <sub>(1.69E-2)</sub> -      | 2.29E-1 <sub>(4.27E-3)</sub> -       | 3.28E-1 <sub>(9.38E-3)</sub> -      | 2.26E-1 <sub>(9.73E-3)</sub> -      |               |
|               | 7 | 1.26E+0 <sub>(1.07E-1)</sub> -      | 3.29E+0 <sub>(1.0E+0)</sub> -        | 1.15E+0 <sub>(1.7E-1)</sub> -       | 2.57E+0 <sub>(2.35E-2)</sub> -      | 2.56E+0 <sub>(1.9E-2)</sub> -       | 2.63E+0 <sub>(3.3E-2)</sub> -       | 2.63E+0 <sub>(3.41E-2)</sub> -       | 2.63E+0 <sub>(2.59E-2)</sub> -      | 2.48E+0 <sub>(2.4E-2)</sub> -       |               |
| CSA           | 2 | 3.09E-03 <sub>(5.0E-04)</sub> -     | 3.44E-02 <sub>(6.8E-03)</sub> -      | 1.19E-02 <sub>(1.4E-03)</sub> -     | 9.28E-03 <sub>(1.5E-03)</sub> -     | 9.43E-04 <sub>(2.2E-04)</sub> -     | 2.60E-03 <sub>(4.4E-04)</sub> -     | 1.13E-02 <sub>(1.3E-03)</sub> -      | 4.76E-03 <sub>(9.2E-04)</sub> -     | 1.49E-03 <sub>(1.1E-04)</sub> -     | <b>0/27/0</b> |
|               | 3 | 6.59E-04 <sub>(5.9E-05)</sub> -     | 1.58E-02 <sub>(1.9E-03)</sub> -      | 5.80E-03 <sub>(2.9E-04)</sub> -     | 4.50E-03 <sub>(2.3E-04)</sub> -     | 9.41E-05 <sub>(4.8E-06)</sub> -     | 1.22E-03 <sub>(8.8E-05)</sub> -     | 6.13E-03 <sub>(2.4E-04)</sub> -      | 1.34E-03 <sub>(8.8E-05)</sub> -     | 3.28E-04 <sub>(1.6E-05)</sub> -     | <b>0/27/0</b> |
|               | 7 | NaN                                 | NaN                                  | NaN                                 | NaN                                 | NaN                                 | NaN                                 | NaN                                  | NaN                                 | NaN                                 | <b>0/27/0</b> |
| DB-CSA        | 2 | <b>7.47E-4</b> <sub>(4.10E-5)</sub> | 1.92E-2 <sub>(1.80E-3)</sub>         | <b>1.10E-2</b> <sub>(1.20E-3)</sub> | <b>1.01E-2</b> <sub>(8.10E-4)</sub> | <b>2.46E-4</b> <sub>(3.50E-5)</sub> | <b>2.50E-4</b> <sub>(4.30E-5)</sub> | 1.46E-2 <sub>(2.20E-3)</sub>         | <b>1.56E-2</b> <sub>(2.40E-3)</sub> | <b>3.85E-4</b> <sub>(5.10E-5)</sub> |               |
|               | 3 | <b>3.13E-4</b> <sub>(3.40E-5)</sub> | <b>7.68E-3</b> <sub>(3.70E-4)</sub>  | <b>2.37E-4</b> <sub>(7.10E-6)</sub> | <b>5.08E-3</b> <sub>(2.70E-4)</sub> | <b>1.38E-4</b> <sub>(2.30E-6)</sub> | <b>1.53E-4</b> <sub>(4.40E-6)</sub> | <b>6.61E-3</b> <sub>(4.40E-4)</sub>  | <b>6.26E-3</b> <sub>(2.80E-4)</sub> | <b>5.51E-4</b> <sub>(3.10E-5)</sub> |               |
|               | 7 | <b>2.42E-4</b> <sub>(1.60E-5)</sub> | <b>3.70E-4</b> <sub>(1.70E-5)</sub>  | <b>5.87E-5</b> <sub>(7.80E-7)</sub> | <b>1.08E-3</b> <sub>(2.00E-5)</sub> | <b>1.65E-4</b> <sub>(5.00E-6)</sub> | <b>6.97E-4</b> <sub>(6.40E-5)</sub> | <b>2.20E-3</b> <sub>(6.90E-5)</sub>  | <b>1.91E-3</b> <sub>(4.40E-5)</sub> | <b>7.93E-4</b> <sub>(3.70E-5)</sub> |               |

The symbols “+”, “ $\approx$ ” and “-” denote that the performance of the compared algorithm is statistically better than, equivalent to, and worse than **DB-CSA**.

**Table S7.** IGD results (Mean and Standard Deviation) of the 13 MOEAs [56] compared to DB-CSA on the 2, 3 and 7 objectives MaF problems.

| Prob.         | M     | MaF1                                | MaF 2                               | MaF 3                               | MaF 4                               | MaF5                                | MaF6                                | MaF7                                | +/- $\approx$ |
|---------------|-------|-------------------------------------|-------------------------------------|-------------------------------------|-------------------------------------|-------------------------------------|-------------------------------------|-------------------------------------|---------------|
| MSOPS-II      | 2     | 5.68E-3 <sub>(2.82E-4)</sub> -      | 3.03E-3 <sub>(1.52E-4)</sub> -      | 1.83E+0 <sub>(2.4E+0)</sub> -       | 2.92E-1 <sub>(3.55E-1)</sub> -      | 5.49E-1 <sub>(9.11E-1)</sub> -      | 7.55E-2 <sub>(5.84E-2)</sub> -      | 7.76E-2 <sub>(1.52E-1)</sub> -      | <b>0/21/0</b> |
|               | 3     | 5.40E-2 <sub>(5.31E-3)</sub> -      | 3.72E-2 <sub>(1.18E-3)</sub> -      | 5.48E+0 <sub>(7.03E+0)</sub> -      | 2.14E+0 <sub>(1.5E+0)</sub> -       | 7.77E-1 <sub>(6.97E-1)</sub> -      | 2.70E-2 <sub>(5.22E-2)</sub> -      | 1.40E-1 <sub>(1.21E-2)</sub> -      |               |
|               | 7     | 2.39E-1 <sub>(1.83E-2)</sub> -      | 1.70E-1 <sub>(4.50E-1)</sub> -      | 2.39E+1 <sub>(5.1E+1)</sub> -       | 1.56E+2 <sub>(1.3E+2)</sub> -       | 2.08E+1 <sub>(8.71E+0)</sub> -      | 1.45E-2 <sub>(2.29E-3)</sub> -      | 9.27E-1 <sub>(2.52E-1)</sub> -      |               |
| MOEA/D        | 2     | 3.57E-3 <sub>(1.21E-7)</sub> -      | 2.58E-3 <sub>(1.54E-4)</sub> -      | 6.66E-1 <sub>(1.32E+0)</sub> -      | 7.41E-1 <sub>(6.20E-1)</sub> -      | 1.46E-1 <sub>(5.15E-1)</sub> -      | 4.14E-3 <sub>(1.52E-4)</sub> -      | 7.03E-2 <sub>(1.53E-1)</sub> -      | <b>0/21/0</b> |
|               | 3     | 7.05E-2 <sub>(1.70E-5)</sub> -      | 4.14E-2 <sub>(1.20E-3)</sub> -      | 9.03E-1 <sub>(1.18E+0)</sub> -      | 2.27E+0 <sub>(1.1E+0)</sub> -       | 1.58E+0 <sub>(1.22E+0)</sub> -      | 9.94E-2 <sub>(1.48E-1)</sub> -      | 1.54E-1 <sub>(1.74E-3)</sub> -      |               |
|               | 7     | 4.77E-1 <sub>(3.74E-2)</sub> -      | 2.09E-1 <sub>(2.95E-3)</sub> -      | 4.64E-1 <sub>(4.54E-1)</sub> -      | 7.24E+1 <sub>(5.3E+0)</sub> -       | 4.47E+1 <sub>(2.70E+0)</sub> -      | 4.14E-1 <sub>(2.02E-1)</sub> -      | 1.36E+0 <sub>(1.75E-1)</sub> -      |               |
| HypE          | 2     | 3.68E-3 <sub>(1.28E-5)</sub> -      | 2.06E-3 <sub>(1.27E-5)</sub> -      | 1.66E+0 <sub>(2.7E+0)</sub> -       | 2.12E-1 <sub>(3.69E-1)</sub> -      | 6.28E-1 <sub>(8.89E-1)</sub> -      | 9.56E-3 <sub>(3.88E-3)</sub> -      | 3.26E-1 <sub>(2.01E-1)</sub> -      | <b>0/21/0</b> |
|               | 3     | 8.51E-2 <sub>(5.82E-3)</sub> -      | 4.56E-2 <sub>(1.71E-3)</sub> -      | 3.71E+0 <sub>(5.4E+0)</sub> -       | 2.68E+0 <sub>(2.5E+0)</sub> -       | 1.64E+0 <sub>(1.09E+0)</sub> -      | 1.96E-1 <sub>(2.54E-2)</sub> -      | 8.22E-1 <sub>(5.03E-3)</sub> -      |               |
|               | 7     | 2.99E-1 <sub>(6.63E-3)</sub> -      | 4.29E-1 <sub>(2.29E-2)</sub> -      | 1.09E+5 <sub>(1.6E+5)</sub> -       | 7.59E+1 <sub>(5.9E+1)</sub> -       | 1.97E+1 <sub>(3.79E+0)</sub> -      | 2.01E-1 <sub>(3.26E-2)</sub> -      | 3.28E+0 <sub>(2.32E-1)</sub> -      |               |
| PICEA-g       | 2     | 3.82E-3 <sub>(3.90E-5)</sub> -      | 2.21E-3 <sub>(3.00E-5)</sub> -      | 2.18E+2 <sub>(1.4E+2)</sub> -       | 9.79E-1 <sub>(1.05E+0)</sub> -      | 1.46E-1 <sub>(5.15E-1)</sub> -      | 4.57E-3 <sub>(3.10E-4)</sub> -      | 3.47E+2 <sub>(1.14E-1)</sub> -      | <b>0/21/0</b> |
|               | 3     | 4.16E-2 <sub>(4.72E-4)</sub> -      | 3.04E-2 <sub>(7.07E-4)</sub> -      | 2.63E+1 <sub>(1.8E+1)</sub> -       | 6.26E+0 <sub>(5.5E+0)</sub> -       | 7.78E-1 <sub>(6.90E-1)</sub> -      | 4.58E-3 <sub>(3.02E-4)</sub> -      | 3.77E-1 <sub>(2.65E-1)</sub> -      |               |
|               | 7     | 2.16E-1 <sub>(3.34E-3)</sub> -      | 2.16E-1 <sub>(4.08E-2)</sub> -      | 1.31E+9 <sub>(1.3E+9)</sub> -       | 2.95E+2 <sub>(3.4E+2)</sub> -       | 1.07E+1 <sub>(3.50E+0)</sub> -      | 4.38E+3 <sub>(1.77E-4)</sub> -      | 3.03E+0 <sub>(8.23E-1)</sub> -      |               |
| SPEA2/SDE     | 2     | 3.99E-3 <sub>(6.27E-5)</sub> -      | 2.38E-3 <sub>(6.38E-5)</sub> -      | 7.44E-1 <sub>(1.20E+0)</sub> -      | 3.47E-1 <sub>(4.34E-1)</sub> -      | 1.63E+1 <sub>(5.10E-1)</sub> -      | 1.08E-2 <sub>(1.32E-3)</sub> -      | 5.22E-3 <sub>(2.02E-4)</sub> -      | <b>0/21/0</b> |
|               | 3     | 4.20E-2 <sub>(6.20E-4)</sub> -      | 3.09E-2 <sub>(7.86E-4)</sub> -      | 5.51E-1 <sub>(9.40E-1)</sub> -      | 1.89E+0 <sub>(1.9E+0)</sub> -       | 6.60E-1 <sub>(8.28E-1)</sub> -      | 9.57E-3 <sub>(1.19E-3)</sub> -      | 5.86E-2 <sub>(2.56E-3)</sub> -      |               |
|               | 7     | 2.05E-1 <sub>(2.51E-3)</sub> -      | 1.60E-1 <sub>(7.08E-3)</sub> -      | 2.09E+0 <sub>(5.6E+0)</sub> -       | 2.44E+1 <sub>(1.4E+1)</sub> -       | 1.09E+1 <sub>(2.47E+0)</sub> -      | 1.03E-2 <sub>(1.33E-3)</sub> -      | 5.40E-1 <sub>(9.29E-3)</sub> -      |               |
| GrEA          | 2     | 7.83E-3 <sub>(6.05E-5)</sub> -      | 3.99E-3 <sub>(8.78E-5)</sub> -      | 1.07E+0 <sub>(2.1E+0)</sub> -       | 7.02E-1 <sub>(6.75E-1)</sub> -      | 3.20E-2 <sub>(1.18E-3)</sub> -      | 9.85E-3 <sub>(6.53E-4)</sub> -      | 2.98E-2 <sub>(7.39E-3)</sub> -      | <b>0/21/0</b> |
|               | 3     | 4.03E-2 <sub>(9.01E-4)</sub> -      | 3.13E-2 <sub>(6.19E-4)</sub> -      | 2.37E+0 <sub>(3.1E+0)</sub> -       | 3.02E+0 <sub>(3.2E+0)</sub> -       | 5.39E-1 <sub>(5.10E-1)</sub> -      | 2.09E-2 <sub>(5.31E-4)</sub> -      | 8.29E-2 <sub>(4.07E-3)</sub> -      |               |
|               | 7     | 2.21E-1 <sub>(4.66E-3)</sub> -      | 1.66E-1 <sub>(3.06E-3)</sub> -      | 2.79E+5 <sub>(6.6E+5)</sub> -       | 6.41E+1 <sub>(6.7E+1)</sub> -       | 8.60E+0 <sub>(2.44E-1)</sub> -      | 8.24E-2 <sub>(1.54E-1)</sub> -      | 7.13E-1 <sub>(7.15E-2)</sub> -      |               |
| NSGA-III      | 2     | 3.57E-3 <sub>(2.33E-6)</sub> -      | 2.05E-3 <sub>(7.13E-5)</sub> -      | 3.12E+0 <sub>(7.7E+0)</sub> -       | 7.50E-1 <sub>(9.42E-1)</sub> -      | 1.45E-1 <sub>(5.15E-1)</sub> -      | 4.02E-3 <sub>(3.97E-5)</sub> -      | 6.85E-3 <sub>(1.74E-4)</sub> -      | <b>0/21/0</b> |
|               | 3     | 6.16E-2 <sub>(1.91E-3)</sub> -      | 3.67E-2 <sub>(8.54E-4)</sub> -      | 4.09E+0 <sub>(3.5E+0)</sub> -       | 4.64E+0 <sub>(3.3E+0)</sub> -       | 4.95E-1 <sub>(6.22E-1)</sub> -      | 1.49E-2 <sub>(1.56E-3)</sub> -      | 7.67E-2 <sub>(2.96E-3)</sub> -      |               |
|               | 7     | 2.56E-1 <sub>(1.70E-2)</sub> -      | 1.96E-1 <sub>(1.60E-2)</sub> -      | 4.46E+2 <sub>(5.9E+2)</sub> -       | 1.30E+2 <sub>(1.4E+2)</sub> -       | 1.21E+1 <sub>(9.47E-1)</sub> -      | 2.08E-1 <sub>(2.67E-1)</sub> -      | 7.25E-1 <sub>(3.74E-2)</sub> -      |               |
| KnEA          | 2     | 5.06E-3 <sub>(2.14E-4)</sub> -      | 2.15E-2 <sub>(7.69E-3)</sub> -      | 9.27E-1 <sub>(1.16E+0)</sub> -      | 4.63E-1 <sub>(3.83E-1)</sub> -      | 5.71E-1 <sub>(8.97E-1)</sub> -      | 1.48E-1 <sub>(1.80E-2)</sub> -      | 3.40E-2 <sub>(1.48E-2)</sub> -      | <b>0/21/0</b> |
|               | 3     | 4.84E-2 <sub>(7.05E-3)</sub> -      | 3.42E-2 <sub>(1.66E-3)</sub> -      | 2.33E+0 <sub>(5.1E+0)</sub> -       | 1.54E+0 <sub>(1.6E+0)</sub> -       | 3.11E-1 <sub>(9.91E-3)</sub> -      | 4.74E-2 <sub>(3.94E-2)</sub> -      | 6.81E-2 <sub>(6.14E-3)</sub> -      |               |
|               | 7     | 2.05E-1 <sub>(5.09E-3)</sub> -      | 1.63E-1 <sub>(7.03E-3)</sub> -      | 6.37E+0 <sub>(1.7E+0)</sub> -       | 3.03E+2 <sub>(2.7E+2)</sub> -       | 1.29E+1 <sub>(5.11E-1)</sub> -      | 4.50E-1 <sub>(1.62E+0)</sub> -      | 5.07E-1 <sub>(1.38E-2)</sub> -      |               |
| RVEA          | 2     | 3.60E-3 <sub>(3.29E-5)</sub> -      | 2.76E-3 <sub>(1.61E-4)</sub> -      | 1.98E+2 <sub>(2.8E+2)</sub> -       | 2.33E+0 <sub>(1.8E+0)</sub> -       | 1.37E-2 <sub>(1.25E-3)</sub> -      | 7.55E-3 <sub>(8.55E-4)</sub> -      | 2.91E-2 <sub>(4.64E-3)</sub> -      | <b>0/21/0</b> |
|               | 3     | 8.23E-2 <sub>(2.56E-4)</sub> -      | 4.22E-2 <sub>(1.36E-3)</sub> -      | 8.04E+2 <sub>(1.3E+3)</sub> -       | 7.71E+0 <sub>(5.8E+0)</sub> -       | 2.60E-1 <sub>(9.96E-4)</sub> -      | 5.11E-2 <sub>(2.43E-2)</sub> -      | 1.08E-1 <sub>(2.83E-3)</sub> -      |               |
|               | 7     | 4.99E-1 <sub>(7.00E-2)</sub> -      | 4.58E-1 <sub>(1.47E-1)</sub> -      | 5.75E+1 <sub>(5.0E+1)</sub> -       | 4.09E+1 <sub>(1.9E+1)</sub> -       | 1.51E+1 <sub>(3.26E+0)</sub> -      | 1.31E-1 <sub>(2.53E-2)</sub> -      | 1.24E+0 <sub>(2.41E-1)</sub> -      |               |
| Two-Arch2     | 2     | 4.00E-3 <sub>(3.10E-6)</sub> -      | 2.24E-3 <sub>(2.06E-5)</sub> -      | 2.09E+1 <sub>(2.4E+1)</sub> -       | 2.10E+0 <sub>(2.6E+0)</sub> -       | 1.61E+0 <sub>(8.25E-1)</sub> -      | 5.18E-3 <sub>(1.66E-4)</sub> -      | 6.33E-2 <sub>(1.54E-1)</sub> -      | <b>0/21/0</b> |
|               | 3     | 4.15E-2 <sub>(4.28E-4)</sub> -      | 2.91E-2 <sub>(4.68E-4)</sub> -      | 1.25E+1 <sub>(1.3E+1)</sub> -       | 5.49E+0 <sub>(3.6E+0)</sub> -       | 2.54E-1 <sub>(6.40E-3)</sub> -      | 5.84E-3 <sub>(2.83E-4)</sub> -      | 9.69E-2 <sub>(1.03E-1)</sub> -      |               |
|               | 7     | 2.07E-1 <sub>(4.22E-3)</sub> -      | 1.62E-1 <sub>(3.64E-3)</sub> -      | 2.09E+5 <sub>(7.0E+5)</sub> -       | 1.50E+2 <sub>(1.3E+2)</sub> -       | 8.95E+0 <sub>(2.39E-1)</sub> -      | 7.65E-3 <sub>(7.45E-4)</sub> -      | 5.56E-1 <sub>(3.59E-2)</sub> -      |               |
| $\theta$ -DEA | 2     | 3.57E-3 <sub>(4.88E-7)</sub> -      | 2.01E-3 <sub>(7.51E-6)</sub> -      | 1.09E+1 <sub>(3.2E+1)</sub> -       | 2.12E-1 <sub>(3.12E-1)</sub> -      | 4.11E-1 <sub>(8.26E-1)</sub> -      | 4.01E-3 <sub>(6.45E-5)</sub> -      | 5.11E-3 <sub>(7.25E-5)</sub> -      | <b>0/21/0</b> |
|               | 3     | 8.04E-2 <sub>(9.64E-4)</sub> -      | 3.65E-2 <sub>(4.26E-4)</sub> -      | 3.81E+0 <sub>(4.8E+0)</sub> -       | 1.79E+0 <sub>(2.7E+0)</sub> -       | 6.66E-1 <sub>(7.11E-1)</sub> -      | 3.34E-2 <sub>(2.28E-3)</sub> -      | 1.10E-1 <sub>(6.96E-2)</sub> -      |               |
|               | 7     | 2.63E-1 <sub>(5.71E-3)</sub> -      | 2.03E-1 <sub>(1.32E-2)</sub> -      | 2.09E+1 <sub>(1.8E+1)</sub> -       | 4.99E+1 <sub>(4.0E+1)</sub> -       | 1.18E+1 <sub>(5.89E-1)</sub> -      | 1.46E-1 <sub>(5.93E-2)</sub> -      | 7.14E-1 <sub>(7.91E-2)</sub> -      |               |
| MOEA/DD       | 2     | 3.57E-3 <sub>(9.24E-8)</sub> -      | 4.44E-3 <sub>(1.38E-4)</sub> -      | 4.14E+1 <sub>(3.7E+1)</sub> -       | 2.18E+0 <sub>(1.8E+0)</sub> -       | 1.31E-2 <sub>(1.20E-6)</sub> -      | 4.06E-3 <sub>(4.73E-5)</sub> -      | 2.01E-2 <sub>(1.15E-3)</sub> -      | <b>0/21/0</b> |
|               | 3     | 7.82E-2 <sub>(1.97E-3)</sub> -      | 5.58E-2 <sub>(2.08E-3)</sub> -      | 2.66E+1 <sub>(2.7E+1)</sub> -       | 2.01E+0 <sub>(2.4E+0)</sub> -       | 2.97E-1 <sub>(1.89E-4)</sub> -      | 3.05E-2 <sub>(1.45E-3)</sub> -      | 5.06E-1 <sub>(2.54E-1)</sub> -      |               |
|               | 7     | 3.34E-1 <sub>(3.01E-2)</sub> -      | 2.28E-1 <sub>(2.34E-2)</sub> -      | 2.04E+2 <sub>(1.6E+2)</sub> -       | 4.56E+1 <sub>(1.0E+1)</sub> -       | 3.94E+1 <sub>(2.30E+0)</sub> -      | 1.29E-1 <sub>(1.10E-2)</sub> -      | 2.09E+0 <sub>(5.77E-1)</sub> -      |               |
| AnD           | 2     | 4.18E-3 <sub>(2.25E-4)</sub> -      | 2.52E-3 <sub>(9.47E-5)</sub> -      | 1.24E+4 <sub>(1.9E+4)</sub> -       | 2.95E+0 <sub>(1.5E+0)</sub> -       | 1.59E-2 <sub>(1.23E-3)</sub> -      | 2.23E-3 <sub>(7.01E-4)</sub> -      | 9.38E-3 <sub>(8.54E-4)</sub> -      | <b>0/21/0</b> |
|               | 3     | 4.38E-2 <sub>(6.16E-4)</sub> -      | 3.03E-2 <sub>(4.94E-4)</sub> -      | 7.97E+3 <sub>(9.7E+3)</sub> -       | 8.69E+0 <sub>(5.1E+0)</sub> -       | 2.63E-1 <sub>(5.32E-3)</sub> -      | 6.26E-2 <sub>(1.53E-2)</sub> -      | 8.54E-2 <sub>(3.08E-3)</sub> -      |               |
|               | 7     | 2.17E-1 <sub>(1.24E-3)</sub> -      | 1.57E-1 <sub>(5.08E-3)</sub> -      | 7.43E+3 <sub>(1.4E+4)</sub> -       | 9.23E+1 <sub>(8.0E+1)</sub> -       | 9.57E+0 <sub>(4.03E-1)</sub> -      | 3.12E-1 <sub>(6.39E-2)</sub> -      | 5.66E-1 <sub>(2.63E-2)</sub> -      |               |
| CSA           | 2/3/7 | NaN                                 | <b>0/21/0</b> |
| DB-CSA        | 2     | <b>4.86E-4</b> <sub>(2.40E-5)</sub> | <b>6.16E-5</b> <sub>(2.5E-7)</sub>  | <b>2.88E-4</b> <sub>(5.60E-6)</sub> | <b>2.16E-4</b> <sub>(6.20E-7)</sub> | <b>3.89E-4</b> <sub>(2.80E-5)</sub> | <b>3.17E-5</b> <sub>(1.20E-7)</sub> | <b>7.13E-4</b> <sub>(5.30E-6)</sub> |               |
|               | 3     | <b>1.72E-2</b> <sub>(1.60E-3)</sub> | <b>6.16E-5</b> <sub>(2.60E-7)</sub> | <b>2.96E-4</b> <sub>(3.40E-6)</sub> | <b>2.12E-4</b> <sub>(6.30E-7)</sub> | <b>3.72E-4</b> <sub>(3.30E-5)</sub> | <b>3.16E-5</b> <sub>(1.10E-7)</sub> | <b>7.14E-4</b> <sub>(5.70E-6)</sub> |               |
|               | 7     | <b>2.10E-2</b> <sub>(1.50E-3)</sub> | <b>6.17E-5</b> <sub>(2.30E-7)</sub> | <b>2.77E-4</b> <sub>(3.90E-6)</sub> | <b>2.15E-4</b> <sub>(7.90E-7)</sub> | <b>3.84E-4</b> <sub>(3.10E-5)</sub> | <b>3.26E-5</b> <sub>(1.30E-7)</sub> | <b>7.13E-4</b> <sub>(4.90E-6)</sub> |               |

The symbols “+”, “ $\approx$ ” and “-” denote that the performance of the compared algorithm is statistically better than, equivalent to, and worse than **DB-CSA**.

**Table S8.** IGD results (Mean and Standard Deviation) of the 8 MOEAs on the WFG test suite.

| Reference : [55] |    |    |                                |                                |                                |                                |                                |                                |                                |                                 |                                    |
|------------------|----|----|--------------------------------|--------------------------------|--------------------------------|--------------------------------|--------------------------------|--------------------------------|--------------------------------|---------------------------------|------------------------------------|
| Prob.            | M  | D  | PMEA-MA                        | PMEA*-MA                       | SPEA2/SDE                      | NSGA-II+SDR                    | MaOEA/IGD                      | VaEA                           | SPEAR                          | CSA                             | DB-CSA                             |
| <b>WFG1</b>      | 3  | 12 | 6.38E-1 <sub>(6.61E-2)</sub> - | 3.42E-1 <sub>(4.42E-2)</sub> - | 2.37E-1 <sub>(2.90E-2)</sub> - | 2.79E-1 <sub>(4.02E-2)</sub> - | 2.04E+0 <sub>(3.9E-1)</sub> -  | 2.34E-1 <sub>(2.91E-2)</sub> - | 2.63E-1 <sub>(4.78E-2)</sub> - | 2.41E-03 <sub>(2.8E-04)</sub> - | <b>4.24E-3</b> <sub>(1.6E-3)</sub> |
|                  | 5  | 14 | 9.24E-1 <sub>(1.33E-1)</sub> - | 6.07E-1 <sub>(5.13E-2)</sub> - | 4.31E-1 <sub>(2.50E-2)</sub> - | 6.49E-1 <sub>(5.68E-2)</sub> - | 3.52E+0 <sub>(1.56E+0)</sub> - | 7.12E-1 <sub>(7.52E-2)</sub> - | 4.56E-1 <sub>(7.98E-2)</sub> - | NaN                             | <b>1.98E-3</b> <sub>(7.3E-4)</sub> |
|                  | 8  | 17 | 1.55E+0 <sub>(9.4E-2)</sub> -  | 1.31E+0 <sub>(9.67E-2)</sub> - | 1.04E+0 <sub>(3.85E-2)</sub> - | 1.52E+0 <sub>(2.43E-1)</sub> - | 5.57E+0 <sub>(3.40E+0)</sub> - | 1.55E+0 <sub>(1.44E-1)</sub> - | 1.45E+0 <sub>(1.14E-1)</sub> - | NaN                             | <b>1.82E-3</b> <sub>(6.5E-4)</sub> |
|                  | 10 | 19 | 1.65E+0 <sub>(1.0E-1)</sub> -  | 1.48E+0 <sub>(7.64E-2)</sub> - | 1.09E+0 <sub>(2.59E-2)</sub> - | 1.71E+0 <sub>(1.20E-1)</sub> - | 9.49E+0 <sub>(3.40E+0)</sub> - | 1.93E+0 <sub>(2.13E-1)</sub> - | 1.49E+0 <sub>(9.24E-2)</sub> - | NaN                             | <b>1.53E-3</b> <sub>(3.6E-4)</sub> |
|                  | 15 | 24 | 2.07E+0 <sub>(9.8E-2)</sub> -  | 2.44E+0 <sub>(1.56E-1)</sub> - | 1.97E+0 <sub>(8.29E-2)</sub> - | 2.48E+0 <sub>(4.01E-2)</sub> - | 4.35E+0 <sub>(2.52E+0)</sub> - | 2.73E+0 <sub>(2.19E-1)</sub> - | 2.47E+0 <sub>(1.57E-1)</sub> - | NaN                             | <b>1.47E-3</b> <sub>(2.3E-4)</sub> |
| <b>WFG2</b>      | 3  | 12 | 1.70E-1 <sub>(4.62E-3)</sub> - | 1.68E-1 <sub>(3.82E-3)</sub> - | 2.18E-1 <sub>(1.10E-2)</sub> - | 2.03E-1 <sub>(1.45E-2)</sub> - | 1.32E+0 <sub>(3.25E-1)</sub> - | 1.72E-1 <sub>(4.75E-3)</sub> - | 1.71E-1 <sub>(2.95E-3)</sub> - | 1.39E-02 <sub>(2.0E-03)</sub> - | <b>7.22E-3</b> <sub>(7.3E-4)</sub> |
|                  | 5  | 14 | 8.66E-1 <sub>(1.28E-1)</sub> - | 4.01E-1 <sub>(7.17E-3)</sub> - | 4.98E-1 <sub>(2.14E-2)</sub> - | 4.95E-1 <sub>(5.28E-2)</sub> - | 1.16E+0 <sub>(2.65E-1)</sub> - | 3.91E-1 <sub>(4.48E-3)</sub> - | 3.94E-1 <sub>(2.38E-3)</sub> - | NaN                             | <b>3.82E-3</b> <sub>(2.9E-4)</sub> |
|                  | 8  | 17 | 1.85E+0 <sub>(1.0E-1)</sub> -  | 1.07E+0 <sub>(3.55E-2)</sub> - | 1.08E+0 <sub>(3.65E-2)</sub> - | 1.47E+0 <sub>(1.67E-1)</sub> - | 2.12E+0 <sub>(3.91E-1)</sub> - | 9.35E-1 <sub>(1.27E-2)</sub> - | 9.65E-1 <sub>(1.84E-2)</sub> - | NaN                             | <b>4.27E-3</b> <sub>(6.8E-4)</sub> |
|                  | 10 | 19 | 1.94E+0 <sub>(3.1E-2)</sub> -  | 1.18E+0 <sub>(3.62E-2)</sub> - | 1.14E+0 <sub>(3.81E-2)</sub> - | 1.62E+0 <sub>(1.38E-1)</sub> - | 2.28E+0 <sub>(5.57E-1)</sub> - | 1.01E+0 <sub>(1.17E-2)</sub> - | 1.08E+0 <sub>(1.08E-2)</sub> - | NaN                             | <b>2.75E-3</b> <sub>(5.5E-4)</sub> |
|                  | 15 | 24 | 2.52E+0 <sub>(4.0E-2)</sub> -  | 1.89E+0 <sub>(4.72E-2)</sub> - | 1.88E+0 <sub>(5.98E-2)</sub> - | 2.42E+0 <sub>(4.94E-2)</sub> - | 3.15E+0 <sub>(1.38E+0)</sub> - | 1.76E+0 <sub>(4.39E-2)</sub> - | 1.87E+0 <sub>(7.38E-2)</sub> - | NaN                             | <b>5.06E-3</b> <sub>(1.1E-3)</sub> |
| <b>WFG3</b>      | 3  | 12 | 1.16E-1 <sub>(1.29E-2)</sub> - | 1.12E-1 <sub>(8.45E-3)</sub> - | 7.16E-2 <sub>(6.18E-3)</sub> - | 1.15E-1 <sub>(6.24E-2)</sub> - | 3.19E+0 <sub>(3.23E-2)</sub> - | 1.36E-1 <sub>(1.22E-2)</sub> - | 1.46E-1 <sub>(1.27E-2)</sub> - | 5.17E-03 <sub>(4.0E-04)</sub> - | <b>1.28E-3</b> <sub>(6.8E-5)</sub> |
|                  | 5  | 14 | 5.02E-1 <sub>(4.61E-2)</sub> - | 5.09E-1 <sub>(1.66E-2)</sub> - | 4.86E-1 <sub>(1.56E-1)</sub> - | 3.59E-1 <sub>(3.76E-2)</sub> - | 4.73E+0 <sub>(1.83E+0)</sub> - | 5.38E-1 <sub>(4.57E-2)</sub> - | 4.65E-1 <sub>(5.11E-2)</sub> - | NaN                             | <b>7.90E-4</b> <sub>(5.1E-5)</sub> |
|                  | 8  | 17 | 1.49E+0 <sub>(1.6E-1)</sub> -  | 1.45E+0 <sub>(1.74E-1)</sub> - | 1.44E+0 <sub>(8.43E-1)</sub> - | 1.13E+0 <sub>(3.76E+0)</sub> - | 6.08E+0 <sub>(1.53E-1)</sub> - | 1.50E+0 <sub>(1.53E-1)</sub> - | 1.78E+0 <sub>(2.00E-1)</sub> - | NaN                             | <b>6.10E-4</b> <sub>(5.8E-5)</sub> |
|                  | 10 | 19 | 1.97E+0 <sub>(1.8E-1)</sub> -  | 2.00E+0 <sub>(2.34E-1)</sub> - | 1.66E+0 <sub>(7.33E-1)</sub> - | 1.63E+0 <sub>(6.21E-1)</sub> - | 4.76E+0 <sub>(4.49E+0)</sub> - | 1.79E+0 <sub>(2.11E-1)</sub> - | 1.94E+0 <sub>(1.63E-1)</sub> - | NaN                             | <b>4.81E-4</b> <sub>(5.7E-5)</sub> |
|                  | 15 | 24 | 3.77E+0 <sub>(4.3E-1)</sub> -  | 3.51E+0 <sub>(5.24E-1)</sub> - | 7.13E+0 <sub>(2.08E+0)</sub> - | 4.53E+0 <sub>(1.35E+0)</sub> - | 7.55E+0 <sub>(4.55E+0)</sub> - | 3.82E+0 <sub>(4.41E-1)</sub> - | 4.39E+0 <sub>(5.34E-1)</sub> - | NaN                             | <b>9.57E-4</b> <sub>(1.0E-4)</sub> |
| <b>WFG4</b>      | 3  | 12 | 2.24E-1 <sub>(4.05E-3)</sub> - | 2.29E-1 <sub>(4.17E-3)</sub> - | 3.36E-1 <sub>(1.97E-2)</sub> - | 2.55E-1 <sub>(8.55E-3)</sub> - | 3.82E+0 <sub>(5.07E-1)</sub> - | 2.31E-1 <sub>(4.01E-3)</sub> - | 2.27E-1 <sub>(3.06E-3)</sub> - | 4.96E-03 <sub>(3.8E-04)</sub> - | <b>5.28E-3</b> <sub>(3.9E-4)</sub> |
|                  | 5  | 14 | 9.35E-1 <sub>(6.44E-3)</sub> - | 9.54E-1 <sub>(6.05E-3)</sub> - | 1.39E+0 <sub>(1.42E-2)</sub> - | 9.89E-1 <sub>(7.86E-3)</sub> - | 6.39E+0 <sub>(1.17E+0)</sub> - | 9.47E-1 <sub>(5.63E-3)</sub> - | 9.75E-1 <sub>(3.62E-3)</sub> - | NaN                             | <b>2.23E-3</b> <sub>(6.9E-5)</sub> |
|                  | 8  | 17 | 2.92E+0 <sub>(2.2E-2)</sub> -  | 3.06E+0 <sub>(2.38E-2)</sub> - | 3.24E+0 <sub>(3.16E-2)</sub> - | 3.21E+0 <sub>(3.17E-2)</sub> - | 9.55E+0 <sub>(1.25E+0)</sub> - | 3.00E+0 <sub>(3.17E-2)</sub> - | 2.98E+0 <sub>(1.05E-2)</sub> - | NaN                             | <b>2.19E-3</b> <sub>(7.4E-5)</sub> |
|                  | 10 | 19 | 3.97E+0 <sub>(2.5E-2)</sub> -  | 4.19E+0 <sub>(3.08E-2)</sub> - | 4.44E+0 <sub>(5.25E-2)</sub> - | 4.38E+0 <sub>(3.72E-2)</sub> - | 1.13E+1 <sub>(2.11E+0)</sub> - | 4.03E+0 <sub>(2.45E-2)</sub> - | 4.56E+0 <sub>(1.08E-2)</sub> - | NaN                             | <b>1.45E-3</b> <sub>(3.9E-5)</sub> |
|                  | 15 | 24 | 8.27E+0 <sub>(9.1E-2)</sub> -  | 8.81E+0 <sub>(9.68E-2)</sub> - | 9.98E+0 <sub>(7.35E-1)</sub> - | 9.39E+0 <sub>(5.28E-1)</sub> - | 1.69E+1 <sub>(9.10E+0)</sub> - | 8.26E+0 <sub>(7.86E-2)</sub> - | 9.41E+0 <sub>(3.17E-2)</sub> - | NaN                             | <b>2.01E-3</b> <sub>(4.6E-5)</sub> |
| <b>WFG5</b>      | 3  | 12 | 2.33E-1 <sub>(3.46E-3)</sub> - | 2.40E-1 <sub>(3.60E-3)</sub> - | 3.44E-1 <sub>(1.57E-2)</sub> - | 2.60E-1 <sub>(5.91E-3)</sub> - | 2.16E+0 <sub>(1.30E+0)</sub> - | 2.39E-1 <sub>(2.59E-3)</sub> - | 2.37E-1 <sub>(3.25E-3)</sub> - | 2.66E-04 <sub>(1.5E-05)</sub> - | <b>7.94E-4</b> <sub>(7.0E-5)</sub> |
|                  | 5  | 14 | 9.29E-1 <sub>(6.58E-3)</sub> - | 9.57E-1 <sub>(6.75E-3)</sub> - | 1.15E+0 <sub>(1.60E-2)</sub> - | 9.87E-1 <sub>(1.35E-2)</sub> - | 2.11E+0 <sub>(1.38E+0)</sub> - | 9.42E-1 <sub>(6.17E-3)</sub> - | 9.66E-1 <sub>(3.79E-3)</sub> - | NaN                             | <b>1.06E-3</b> <sub>(2.9E-5)</sub> |
|                  | 8  | 17 | 2.94E+0 <sub>(2.2E-2)</sub> -  | 3.13E+0 <sub>(3.12E-2)</sub> - | 3.24E+0 <sub>(4.37E-2)</sub> - | 3.25E+0 <sub>(3.30E-2)</sub> - | 7.09E+0 <sub>(4.97E+0)</sub> - | 3.04E+0 <sub>(9.39E-2)</sub> - | 2.95E+0 <sub>(8.36E-3)</sub> - | NaN                             | <b>1.64E-3</b> <sub>(3.2E-5)</sub> |
|                  | 10 | 19 | 3.91E+0 <sub>(2.6E-2)</sub> -  | 4.23E+0 <sub>(4.61E-2)</sub> - | 4.43E+0 <sub>(3.62E-2)</sub> - | 4.42E+0 <sub>(5.99E-2)</sub> - | 9.18E+0 <sub>(6.57E+0)</sub> - | 4.00E+0 <sub>(8.28E-2)</sub> - | 4.54E+0 <sub>(8.28E-2)</sub> - | NaN                             | <b>1.57E-3</b> <sub>(1.3E-5)</sub> |
|                  | 15 | 24 | 8.04E+0 <sub>(8.9E-2)</sub> -  | 8.87E+0 <sub>(4.42E-2)</sub> - | 1.13E+1 <sub>(5.60E-1)</sub> - | 9.39E+0 <sub>(2.86E-1)</sub> - | 1.85E+1 <sub>(1.11E+1)</sub> - | 7.98E+0 <sub>(6.16E-2)</sub> - | 9.27E+0 <sub>(2.42E-2)</sub> - | NaN                             | <b>1.99E-3</b> <sub>(3.1E-5)</sub> |
| <b>WFG6</b>      | 3  | 12 | 2.47E-1 <sub>(1.22E-2)</sub> - | 2.54E-1 <sub>(1.23E-2)</sub> - | 3.53E-1 <sub>(1.47E-2)</sub> - | 2.69E-1 <sub>(1.04E-2)</sub> - | 2.33E+0 <sub>(1.21E+0)</sub> - | 2.56E-1 <sub>(1.03E-2)</sub> - | 2.46E-1 <sub>(8.54E-3)</sub> - | 1.92E-03 <sub>(1.2E-04)</sub> - | <b>1.21E-3</b> <sub>(2.8E-4)</sub> |
|                  | 5  | 14 | 9.44E-1 <sub>(7.53E-3)</sub> - | 9.77E-1 <sub>(8.15E-3)</sub> - | 1.19E+0 <sub>(1.81E-2)</sub> - | 9.99E-1 <sub>(1.13E-2)</sub> - | 1.05E+0 <sub>(1.49E-2)</sub> - | 5.5E+0 <sub>(1.21E+0)</sub> -  | 9.69E-1 <sub>(3.67E-3)</sub> - | NaN                             | <b>1.92E-3</b> <sub>(2.0E-4)</sub> |
|                  | 8  | 17 | 3.02E+0 <sub>(3.4E-2)</sub> -  | 3.22E+0 <sub>(3.37E-2)</sub> - | 3.34E+0 <sub>(5.37E-2)</sub> - | 3.34E+0 <sub>(3.90E-2)</sub> - | 9.22E+0 <sub>(4.16E+0)</sub> - | 3.12E+0 <sub>(4.26E-2)</sub> - | 2.99E+0 <sub>(1.80E-2)</sub> - | NaN                             | <b>3.33E-3</b> <sub>(2.6E-4)</sub> |
|                  | 10 | 19 | 3.98E+0 <sub>(3.1E-2)</sub> -  | 4.35E+0 <sub>(4.86E-2)</sub> - | 4.56E+0 <sub>(4.35E-2)</sub> - | 4.53E+0 <sub>(7.34E-2)</sub> - | 9.16E+0 <sub>(5.32E+0)</sub> - | 4.09E+0 <sub>(3.27E-2)</sub> - | 4.58E+0 <sub>(1.07E-2)</sub> - | NaN                             | <b>2.82E-3</b> <sub>(1.1E-4)</sub> |
|                  | 15 | 24 | 7.96E+0 <sub>(9.1E-2)</sub> -  | 8.97E+0 <sub>(5.20E-2)</sub> - | 1.05E+1 <sub>(7.98E-1)</sub> - | 1.03E+1 <sub>(1.27E+0)</sub> - | 2.07E+1 <sub>(8.74E+0)</sub> - | 7.92E+0 <sub>(7.55E-2)</sub> - | 9.44E+0 <sub>(9.96E-2)</sub> - | NaN                             | <b>3.83E-3</b> <sub>(1.5E-4)</sub> |
| <b>WFG7</b>      | 3  | 12 | 2.24E-1 <sub>(2.77E-3)</sub> - | 2.29E-1 <sub>(4.00E-3)</sub> - | 3.43E-1 <sub>(1.46E-2)</sub> - | 2.50E-1 <sub>(4.85E-3)</sub> - | 2.57E+0 <sub>(1.18E+0)</sub> - | 2.33E-1 <sub>(3.94E-3)</sub> - | 2.28E-1 <sub>(3.63E-3)</sub> - | 6.41E-03 <sub>(4.4E-04)</sub> - | <b>6.40E-3</b> <sub>(3.8E-4)</sub> |
|                  | 5  | 14 | 9.37E-1 <sub>(7.57E-3)</sub> - | 9.66E-1 <sub>(6.15E-3)</sub> - | 1.17E+0 <sub>(2.05E-2)</sub> - | 9.93E-1 <sub>(1.13E-2)</sub> - | 3.89E+0 <sub>(1.66E+0)</sub> - | 9.51E-1 <sub>(7.33E-3)</sub> - | 9.71E-1 <sub>(2.05E-3)</sub> - | NaN                             | <b>3.42E-3</b> <sub>(1.2E-4)</sub> |
|                  | 8  | 17 | 2.94E+0 <sub>(2.4E-2)</sub> -  | 3.14E+0 <sub>(3.66E-2)</sub> - | 3.18E+0 <sub>(3.76E-2)</sub> - | 3.29E+0 <sub>(4.93E-2)</sub> - | 8.39E+0 <sub>(3.76E+0)</sub> - | 3.07E+0 <sub>(4.85E-2)</sub> - | 2.98E+0 <sub>(1.01E-2)</sub> - | NaN                             | <b>3.82E-3</b> <sub>(1.1E-4)</sub> |
|                  | 10 | 19 | 3.93E+0 <sub>(2.7E-2)</sub> -  | 4.23E+0 <sub>(3.26E-2)</sub> - | 4.40E+0 <sub>(4.95E-2)</sub> - | 4.43E+0 <sub>(6.35E-2)</sub> - | 7.61E+0 <sub>(3.31E+0)</sub> - | 4.01E+0 <sub>(2.21E-2)</sub> - | 4.55E+0 <sub>(2.81E-2)</sub> - | NaN                             | <b>2.72E-3</b> <sub>(1.0E-4)</sub> |
|                  | 15 | 24 | 8.14E+0 <sub>(1.1E-1)</sub> -  | 8.68E+0 <sub>(6.56E-2)</sub> - | 9.23E+0 <sub>(4.17E-1)</sub> - | 1.11E+1 <sub>(1.24E+0)</sub> - | 1.85E+1 <sub>(8.66E+0)</sub> - | 8.08E+0 <sub>(7.35E-2)</sub> - | 9.36E+0 <sub>(4.33E-2)</sub> - | NaN                             | <b>4.08E-3</b> <sub>(1.7E-4)</sub> |
| <b>WFG8</b>      | 3  | 12 | 2.76E-1 <sub>(3.48E-3)</sub> - | 2.95E-1 <sub>(4.12E-3)</sub> - | 3.76E-1 <sub>(1.08E-2)</sub> - | 3.31E-1 <sub>(7.75E-3)</sub> - | 3.65E+0 <sub>(4.00E-1)</sub> - | 3.06E-1 <sub>(5.90E-3)</sub> - | 2.74E-1 <sub>(2.41E-3)</sub> - | 2.42E-03 <sub>(1.6E-04)</sub> - | <b>6.92E-3</b> <sub>(3.1E-4)</sub> |
|                  | 5  | 14 | 9.68E-1 <sub>(4.84E-3)</sub> - | 1.02E+0 <sub>(6.57E-3)</sub> - | 1.16E+0 <sub>(1.61E-2)</sub> - | 1.05E+0 <sub>(1.31E-2)</sub> - | 4.57E+0 <sub>(9.65E-1)</sub> - | 1.07E+0 <sub>(1.28E-2)</sub> - | 9.89E-1 <sub>(3.03E-3)</sub> - | NaN                             | <b>2.89E-3</b> <sub>(9.3E-5)</sub> |
|                  | 8  | 17 | 3.06E+0 <sub>(4.9E-2)</sub> -  | 3.23E+0 <sub>(4.12E-2)</sub> - | 3.39E+0 <sub>(3.62E-2)</sub> - | 3.32E+0 <sub>(4.09E-2)</sub> - | 9.09E+0 <sub>(2.85E+0)</sub> - | 3.28E+0 <sub>(3.03E-2)</sub> - | 3.09E+0 <sub>(3.27E-2)</sub> - | NaN                             | <b>3.71E-3</b> <sub>(9.1E-5)</sub> |
|                  | 10 | 19 | 3.99E+0 <sub>(6.9E-2)</sub> -  | 4.39E+0 <sub>(5.12E-2)</sub> - | 4.55E+0 <sub>(3.82E-2)</sub> - | 4.52E+0 <sub>(5.66E-2)</sub> - | 1.31E+1 <sub>(2.37E+0)</sub> - | 4.32E+0 <sub>(5.20E-2)</sub> - | 4.65E+0 <sub>(1.97E-2)</sub> - | NaN                             | <b>2.70E-3</b> <sub>(7.3E-5)</sub> |
|                  | 15 | 24 | 8.52E+0 <sub>(1.4E-1)</sub> -  | 8.71E+0 <sub>(7.50E-2)</sub> - | 9.04E+0 <sub>(1.26E-1)</sub> - | 9.83E+0 <sub>(9.41E-1)</sub> - | 2.46E+1 <sub>(2.95E+0)</sub> - | 8.59E+0 <sub>(1.57E-1)</sub> - | 9.39E+0 <sub>(5.40E-2)</sub> - | NaN                             | <b>3.92E-3</b> <sub>(1.7E-4)</sub> |
| <b>WFG9</b>      | 3  | 12 | 2.18E-1 <sub>(2.70E-3)</sub> - | 2.25E-1 <sub>(3.27E-3)</sub> - | 3.27E-1 <sub>(1.94E-2)</sub> - | 2.51E-1 <sub>(7.00E-3)</sub> - | 2.07E+0 <sub>(7.20E-1)</sub> - | 2.33E-1 <sub>(2.35E-2)</sub> - | 2.24E-1 <sub>(1.50E-3)</sub> - | 1.23E-03 <sub>(7.8E-05)</sub> - | <b>2.11E-3</b> <sub>(2.5E-4)</sub> |
|                  | 5  | 14 | 9.14E-1 <sub>(5.30E-3)</sub> - | 9.27E-1 <sub>(5.68E-3)</sub> - | 1.09E+0 <sub>(1.82E-2)</sub> - | 9.77E-1 <sub>(1.12E-2)</sub> - | 3.71E+0 <sub>(1.60E+0)</sub> - | 9.30E-1 <sub>(6.40E-3)</sub> - | 9.44E-1 <sub>(2.86E-3)</sub> - | NaN                             | <b>2.55E-3</b> <sub>(8.6E-5)</sub> |
|                  | 8  | 17 | 2.95E+0 <sub>(1.7E-2)</sub> -  | 3.03E+0 <sub>(3.18E-2)</sub> - | 3.22E+0 <sub>(3.34E-2)</sub> - | 3.18E+0 <sub>(4.37E-2)</sub> - | 4.77E+0 <sub>(2.08E+0)</sub> - | 3.02E+0 <sub>(2.65E-2)</sub> - | 2.94E+0 <sub>(8.74E-3)</sub> - | NaN                             | <b>3.56E-3</b> <sub>(1.1E-4)</sub> |
|                  | 10 | 19 | 3.94E+0 <sub>(3.2E-2)</sub> -  | 4.09E+0 <sub>(3.35E-2)</sub> - | 4.64E+0 <sub>(2.54E-1)</sub> - | 4.43E+0 <sub>(1.05E-1)</sub> - | 4.38E+0 <sub>(4.74E-2)</sub> - | 3.98E+0 <sub>(2.75E-2)</sub> - | 4.52E+0 <sub>(1.56E-2)</sub> - | NaN                             | <b>2.96E-3</b> <sub>(5.7E-5)</sub> |
|                  | 15 | 24 | 7.92E+0 <sub>(1.4E-1)</sub> -  | 8.47E+0 <sub>(1.07E-1)</sub> - | 8.88E+0 <sub>(3.66E-1)</sub> - | 8.89E+0 <sub>(4.35E-1)</sub> - | 9.02E+0 <sub>(7.35E-1)</sub> - | 7.79E+0 <sub>(7.89E-2)</sub> - | 9.12E+0 <sub>(2.73E-2)</sub> - | NaN                             | <b>4.24E-3</b> <sub>(8.1E-5)</sub> |
| +/- ≈            |    |    | 0/45/0                         | 0/45/0                         | 0/45/0                         | 0/45/0                         | 0/45/0                         | 0/45/0                         | 0/45/0                         | 0/45/0                          | 0/45/0                             |

The symbols “+”, “≈” and “-” denote that the performance of the compared algorithm is statistically better than, equivalent to, and worse than **DB-CSA**.



**Table S9.** IGD results (Mean and Standard Deviation) of the 8 MOEAs on the DTLZ test suite.

| Reference : [55] |    |    |                           |                    |                    |                    |                    |                    |                    |                   |                        |
|------------------|----|----|---------------------------|--------------------|--------------------|--------------------|--------------------|--------------------|--------------------|-------------------|------------------------|
| Prob.            | M  | D  | PMEA-MA                   | PMEA*-MA           | SPEA2/SDE          | NSGA-II+SDR        | MaOEA/IGD          | VaEA               | SPEAR              | CSA               | DB-CSA                 |
| <b>DTLZ1</b>     | 3  | 7  | 2.58E-2(1.71E-3)-         | 2.20E-2(3.79E-4) - | 2.16E-2(3.45E-4) - | 3.43E-2(8.40E-3) - | 7.48E-1(4.05E-1) - | 3.62E-2(2.38E-2) - | 2.58E-2(1.59E-2) - | 5.74e-02(8.4e-04) | <b>1.19E-2(1.4E-3)</b> |
|                  | 5  | 9  | 5.29E-2(9.08E-4) -        | 5.29E-2(4.77E-4) - | 5.00E-2(2.76E-4) - | 7.38E-2(9.06E-3) - | 3.33E-1(2.69E-1) - | 1.06E-1(3.24E-2) - | 8.07E-2(2.33E-2) - | NaN               | <b>1.47E-2(1.3E-3)</b> |
|                  | 8  | 12 | 1.15E-1(2.57E-3) -        | 1.04E-1(1.19E-3) - | 9.61E-2(5.25E-4) - | 1.61E-1(1.18E-2) - | 4.78E-1(4.28E-1) - | 1.99E-1(2.25E-2) - | 1.26E-1(1.48E-2) - | NaN               | <b>1.52e-2(2.8e-3)</b> |
|                  | 10 | 14 | 1.15E-1(1.31E-3) -        | 1.08E-1(1.50E-3) - | 1.01E-1(5.01E-4) - | 1.68E-1(1.29E-2) - | 1.40E-1(1.02E-1) - | 1.92E-1(1.83E-2) - | 1.52E-1(2.87E-2) - | NaN               | <b>2.20e-2(3.3e-3)</b> |
|                  | 15 | 19 | 1.39E-1(1.41E-3) -        | 2.62E-1(6.19E-2) - | 1.34E-1(1.17E-3) - | 2.00E-1(2.76E-2) - | 6.09E-1(9.50E-1) - | 2.48E-1(8.41E-2) - | 3.11E-1(1.53E-1) - | NaN               | <b>2.80e-2(4.6e-3)</b> |
| <b>DTLZ 2</b>    | 3  | 12 | 5.59E-2(5.74E-4) -        | 5.72E-2(5.53E-4) - | 7.92E-2(2.61E-3) - | 4.70E-1(1.99E-2) - | 1.81E-1(4.98E-2) - | 5.78E-2(6.49E-4) - | 5.77E-2(1.81E-3) - | 1.48e-02(6.4e-05) | <b>9.52E-3(1.8E-3)</b> |
|                  | 5  | 14 | 1.63E-1(1.00E-3) -        | 1.66E-1(6.93E-4) - | 1.90E-1(1.68E-3) - | 1.65E-1(3.04E-5) - | 1.69E-1(6.53E-4) - | 1.68E-1(9.78E-4) - | 1.69E-1(1.18E-3) - | NaN               | <b>4.54E-3(2.0E-4)</b> |
|                  | 8  | 17 | 3.51E-1(2.36E-3) -        | 3.56E-1(2.03E-3) - | 3.60E-1(1.68E-3) - | 4.18E-1(8.53E-2) - | 3.44E-1(2.07E-2) - | 3.66E-1(2.34E-3) - | 3.25E-1(2.07E-3) - | NaN               | <b>3.98e-3(1.8e-4)</b> |
|                  | 10 | 19 | 3.98E-1(2.08E-3) -        | 4.15E-1(1.90E-3) - | 4.23E-1(2.19E-3) - | 4.35E-1(6.45E-3) - | 4.33E-1(3.30E-3) - | 4.28E-1(4.66E-3) - | 4.31E-1(2.60E-3) - | NaN               | <b>2.32e-3(7.3e-5)</b> |
|                  | 15 | 24 | 5.77E-1(7.07E-3) -        | 6.12E-1(2.09E-3) - | 6.03E-1(2.70E-3) - | 6.71E-1(6.17E-2) - | 7.83E-1(7.52E-2) - | 6.29E-1(2.09E-2) - | 6.63E-1(1.10E-2) - | NaN               | <b>2.52e-3(4.7e-5)</b> |
| <b>DTLZ 3</b>    | 3  | 12 | 5.73E-2(1.05E-3) -        | 6.41E-2(2.73E-2) - | 7.84E-2(3.16E-3) - | 4.42E-1(3.39E-2) - | 1.64E+1(7.51E+0)-  | 5.92E-2(6.55E-3) - | 2.14E-1(7.45E-2) - | 8.14e-02(8.9e-04) | <b>1.41E-2(1.4E-3)</b> |
|                  | 5  | 14 | 1.66E-1(1.91E-3) -        | 2.45E-1(9.39E-2) - | 1.89E-1(1.65E-3) - | 1.82E-1(3.49E-3) - | 1.15E+1(3.85E+0)-  | 3.35E-1(7.89E-2) - | 5.06E-1(1.78E-1) - | NaN               | <b>4.52E-3(2.0E-4)</b> |
|                  | 8  | 17 | 3.56E-1(4.14E-3) -        | 4.84E-1(5.03E-2) - | 3.69E-1(1.44E-2) - | 4.55E-1(1.19E-1) - | 1.03E+1(6.52E+0)-  | 2.25E+0(1.44E+0)-  | 6.42E+0(3.37E+0)-  | NaN               | <b>1.89e-3(4.5e-5)</b> |
|                  | 10 | 19 | 4.00E-1(2.94E-3) -        | 6.09E-1(3.87E-2) - | 4.27E-1(5.62E-3) - | 4.37E-1(5.48E-3) - | 4.98E+0(3.15E+0)-  | 3.99E+0(2.30E+0)-  | 1.31E+1(8.98E+0)-  | NaN               | <b>1.17e-3(2.0e-5)</b> |
|                  | 15 | 24 | 5.81E-1(6.33E-3) -        | 1.42E+0(8.27E-1) - | 6.22E-1(8.34E-3) - | 8.01E-1(8.22E-2) - | 6.46E+0(6.28E+0)-  | 9.22E+0(5.83E+0)-  | 4.91E+1(1.91E+1)-  | NaN               | <b>8.90e-4(2.2e-5)</b> |
| <b>DTLZ 4</b>    | 3  | 12 | 5.61E-2(6.58E-4) -        | 5.73E-2(6.68E-4) - | 2.45E-1(2.74E-1) - | 5.17E-1(9.85E-2) - | 3.64E-1(1.80E-1) - | 5.78E-2(7.26E-4) - | 5.78E-2(1.33E-3) - | 5.31e-02(5.8e-04) | <b>5.07E-2(1.1E-2)</b> |
|                  | 5  | 14 | 1.64E-1(1.04E-3) -        | 1.66E-1(5.25E-4) - | 1.98E-1(4.08E-2) - | 6.45E-1(8.57E-2) - | 2.61E-1(1.43E-1) - | 1.70E-1(1.24E-3) - | 1.69E-1(1.19E-3) - | NaN               | <b>7.12E-3(8.5E-4)</b> |
|                  | 8  | 17 | 3.52E-1(1.46E-3) -        | 3.53E-1(1.20E-3) - | 3.63E-1(1.62E-2) - | 7.72E-1(9.05E-2) - | 3.79E-1(5.66E-2) - | 3.69E-1(4.46E-3) - | 3.46E-1(3.71E-3) - | NaN               | <b>7.13e-3(4.8e-4)</b> |
|                  | 10 | 19 | 3.99E-1(1.08E-3) -        | 4.11E-1(1.29E-3) - | 4.17E-1(1.30E-3) - | 7.65E-1(8.29E-2) - | 4.49E-1(2.43E-2) - | 4.39E-1(8.96E-3) - | 4.62E-1(4.10E-3) - | NaN               | <b>2.57e-3(1.3e-4)</b> |
|                  | 15 | 24 | 5.72E-1(2.01E-3) -        | 6.05E-1(3.25E-3) - | 6.03E-1(1.06E-2) - | 8.19E-1(2.38E-2) - | 6.57E-1(2.57E-2) - | 6.21E-1(1.23E-2) - | 6.59E-1(9.19E-3) - | NaN               | <b>6.77e-4(2.9e-5)</b> |
| <b>DTLZ 5</b>    | 3  | 12 | <b>4.89E-3(1.28E-4) +</b> | 5.03E-3(9.89E-5) + | 1.09E-2(1.27E-3) - | 3.13E-2(5.2E-3) +  | 5.12E-1(2.12E-1) - | 5.44E-3(2.21E-4) + | 2.99E-2(3.46E-3) - | 9.46e-02(1.3e-05) | 8.54E-3(6.6E-4)        |
|                  | 5  | 14 | 9.02E-2(1.69E-2) -        | 9.72E-2(1.98E-2) - | 6.08E-2(1.09E-2) - | 6.25E-2(1.39E-2) - | 3.77E-1(1.54E-1) - | 1.13E-1(2.67E-2) - | 2.02E-1(4.24E-2) - | NaN               | <b>3.21E-4(1.6E-5)</b> |
|                  | 8  | 17 | 1.75E-1(2.36E-2) -        | 2.71E-1(4.95E-2) - | 1.21E-1(2.18E-2) - | 1.23E-1(2.09E-2) - | 5.57E-1(1.89E-1) - | 3.13E-1(7.07E-2) - | 4.43E-1(8.34E-2) - | NaN               | <b>2.49e-4(6.7e-6)</b> |
|                  | 10 | 19 | 2.04E-1(3.23E-2) -        | 3.36E-1(5.81E-2) - | 1.48E-1(3.15E-2) - | 1.63E-1(3.13E-2) - | 4.91E-1(1.94E-1) - | 3.97E-1(9.26E-2) - | 6.75E-1(1.55E-1) - | NaN               | <b>1.79e-4(2.6e-6)</b> |
|                  | 15 | 24 | 3.53E-1(7.07E-2) -        | 4.97E-1(9.04E-2) - | 1.64E-1(3.22E-2) - | 1.02E-1(2.00E-2) - | 6.58E-1(1.69E-1) - | 5.29E-1(1.15E-1) - | 9.39E-1(2.96E-1) - | NaN               | <b>2.71e-4(2.9e-6)</b> |
| <b>DTLZ 6</b>    | 3  | 12 | 4.84E-3(1.09E-4) -        | 4.92E-3(1.04E-4) - | 1.07E-2(1.25E-3) - | 5.98E-2(1.52E-2) - | 6.45E-1(1.18E-1) - | 5.08E-3(1.50E-4) - | 3.91E-2(8.74E-3) - | 1.80e-03(6.2e-05) | <b>2.82E-4(5.9E-5)</b> |
|                  | 5  | 14 | 1.47E-1(4.03E-2) -        | 1.49E-1(4.74E-2) - | 7.14E-2(1.18E-2) - | 9.32E-2(1.99E-2) - | 6.19E-1(8.32E-2) - | 2.65E-1(4.63E-2) - | 2.95E-1(9.84E-2) - | NaN               | <b>3.08E-4(3.7E-5)</b> |
|                  | 8  | 17 | 2.77E-1(7.58E-2) -        | 4.07E-1(1.47E-1) - | 2.14E-1(4.37E-2) - | 2.27E-1(5.24E-2) - | 8.40E-1(4.31E-1) - | 1.16E+0(6.51E-1) - | 8.82E-1(2.01E-1) - | NaN               | <b>6.02e-4(6.1e-5)</b> |
|                  | 10 | 19 | 3.07E-1(7.55E-2) -        | 4.69E-1(1.37E-1) - | 2.09E-1(3.64E-2) - | 2.52E-1(7.25E-2) - | 6.65E-1(1.18E-1) - | 1.43E+0(5.42E-1) - | 1.12E+0(1.84E-1) - | NaN               | <b>5.50e-4(3.0e-5)</b> |
|                  | 15 | 24 | 4.86E-1(1.51E-1) -        | 5.85E-1(2.00E-1) - | 3.38E-1(2.59E-2) - | 1.24E-1(2.70E-2) - | 7.07E-1(7.32E-2) - | 5.71E-1(3.50E-1) - | 9.02E+0(6.38E-1) - | NaN               | <b>9.69e-4(7.6e-5)</b> |
| <b>DTLZ 7</b>    | 3  | 22 | 5.98E-2(1.48E-3) -        | 6.95E-2(5.27E-2) - | 8.24E-2(7.77E-2) - | 9.15E-2(6.18E-3) - | 8.03E-1(4.39E-1) - | 7.42E-2(5.20E-2) - | 9.53E-2(1.96E-3) - | 1.01e-02(1.3e-03) | <b>1.40E-3(2.9E-4)</b> |
|                  | 5  | 24 | 2.71E-1(1.19E-2) -        | 2.51E-1(5.56E-3) - | 2.71E-1(2.65E-2) - | 3.15E-1(2.61E-2) - | 6.64E-1(4.04E-2) - | 2.74E-1(5.88E-3) - | 3.56E-1(5.13E-3) - | NaN               | <b>1.53E-3(1.2E-4)</b> |
|                  | 8  | 27 | 9.87E-1(1.00E-1) -        | 1.06E+0(1.77E-1) - | 7.42E-1(2.00E-2) - | 9.76E-1(1.22E-1) - | 1.23E+0(3.81E-2) - | 7.32E-1(1.98E-2) - | 1.24E+0(5.22E-2) - | NaN               | <b>2.17e-3(9.9e-5)</b> |
|                  | 10 | 29 | 1.20E+0(1.38E-1) -        | 1.22E+0(1.88E-1) - | 8.79E-1(5.94E-2) - | 1.57E+0(2.8E-1) -  | 1.47E+0(4.08E-2) - | 1.07E+0(2.98E-2) - | 2.16E+0(5.17E-2) - | NaN               | <b>1.97e-3(6.1e-5)</b> |
|                  | 15 | 34 | 3.51E+0(3.90E-1) -        | 6.95E+0(2.03E+0)-  | 1.55E+0(3.47E-2) - | 4.66E+0(6.6E-1) -  | 2.65E+0(1.43E-1) - | 2.74E+0(2.72E-1) - | 8.97E+0(6.69E-2) - | NaN               | <b>2.99e-3(7.2e-5)</b> |
| +/-/≈            |    |    | <b>1/34/0</b>             | <b>1/34/0</b>      | <b>0/35/0</b>      | <b>1/34/0</b>      | <b>0/35/0</b>      | <b>1/34/0</b>      | <b>0/35/0</b>      | <b>0/35/0</b>     |                        |

The symbols “+”, “≈” and “-” denote that the performance of the compared algorithm is statistically better than, equivalent to, and worse than **DB-CSA**
